# Supplementary material for: Ag 2 WO 4 nanocatalyst-driven green synthesis of pyrano[2,3- d ]pyrimidinones: an integrated experimental, DFT, and cytotoxic investigation
Source: Royal Society of Chemistry journal article supplement (doi:10.1039/d5ra08635c), 2026-01-01
Supplement: d5ra08635c1.pdf [file d5ra08635c1.pdf]

**Supporting Information**

**Ag<sub>2</sub>WO<sub>4</sub> nanocatalyst-driven green synthesis of pyrano[2,3-d]pyrimidinones: an integrated experimental, DFT, and cytotoxic investigation**

Sathiaseelan Perumal <sup>a,b</sup>, Perumal Muthuraja <sup>c</sup>, M. Sasikumar <sup>b</sup>, R. Hari Krishna <sup>d</sup>, Paramasivam Manisankar <sup>a\*</sup>, Viswanathan Subramanian <sup>a\*</sup>

<sup>a</sup> Department of Industrial Chemistry, Alagappa University, Karaikudi – 630 006, Tamil Nadu, India.

<sup>b</sup> Department of Chemistry, Bishop Heber College, Tiruchirappalli – 620 017, Tamil Nadu, India.

<sup>c</sup> Department of Chemistry, Indian Institute of Technology Guwahati, Guwahati – 781039, India.

<sup>d</sup> Department of Chemistry, M.S. Ramaiah Institute of Technology, Bangalore-560 054, India

\*Correspondence: [manisankarp@alagappauniversity.ac.in](mailto:manisankarp@alagappauniversity.ac.in) (P.M), [rsviswa@gmail.com](mailto:rsviswa@gmail.com) (V.S)

## **Table of Contents – Supplementary Information**

### **1. NMR and IR Spectra**

Fig. S1–S3: NMR ( $^1\text{H}$ ,  $^{13}\text{C}$ ) and IR spectra of compound **2a**

Fig. S4–S6: NMR ( $^1\text{H}$ ,  $^{13}\text{C}$ ) and IR spectra of compound **2b**

Fig. S7–S9: NMR ( $^1\text{H}$ ,  $^{13}\text{C}$ ) and IR spectra of compound **2c**

Fig. S10–S12: NMR ( $^1\text{H}$ ,  $^{13}\text{C}$ ) and IR spectra of compound **2d**

Fig. S13–S15: NMR ( $^1\text{H}$ ,  $^{13}\text{C}$ ) and IR spectra of compound **2e**

Fig. S16–S18: NMR ( $^1\text{H}$ ,  $^{13}\text{C}$ ) and IR spectra of compound **2f**

Fig. S19–S21: NMR ( $^1\text{H}$ ,  $^{13}\text{C}$ ) and IR spectra of compound **2g**

Fig. S22–S24: NMR ( $^1\text{H}$ ,  $^{13}\text{C}$ ) and IR spectra of compound **2h**

Fig. S25–S32: Comparative IR spectra of compound **2a–2h**: Experimental vs Theoretical

### **2. DFT**

Fig. S33 (HOMO, LUMO) orbitals, Molecular Electrostatic Potential plots (MEP) and optimized structures (**2a–2h** and afatinib) at B3LYP/def2-TZVP level in gas phase.

### **2. Molecular Docking**

Fig. S34 AutoDock Vina binding affinities (kcal/mol) of synthesised pyrano[2,3-d]pyrimidinone derivatives derivatives (**1a–1j**) and the reference drug afatinib against PDB ID: 4ZXT.

### **3. MTT Assay**

Fig. S35 Linear regression analysis correlating the molecular docking binding affinities (kcal/mol) with the experimental  $\text{IC}_{50}$  values ( $\mu\text{M}$ ) of the synthesized compounds (**2a–2h** and afatinib).

Fig. S36 *MTT assay evaluation of cytotoxic effects of synthesized compounds (2a–2h) on A549 cell line.*

### **6. Tables**

Table S1: Experimental and calculated  $^1\text{H}$  NMR chemical shifts ( $\delta$  in ppm) of compound **2a** at the B3LYP/def2-TZVP level of theory in DMSO phase

Table S2: Experimental and calculated  $^1\text{H}$  NMR chemical shifts ( $\delta$  in ppm) of compound **2b** at the B3LYP/def2-TZVP level of theory in DMSO phase

Table S3: Experimental and calculated  $^1\text{H}$  NMR chemical shifts ( $\delta$  in ppm) of compound **2c** at the B3LYP/def2-TZVP level of theory in DMSO phase

Table S4: Experimental and calculated  $^1\text{H}$  NMR chemical shifts ( $\delta$  in ppm) of compound **2d** at the B3LYP/def2-TZVP level of theory in DMSO phase

Table S5: Experimental and calculated  $^1\text{H}$  NMR chemical shifts ( $\delta$  in ppm) of compound **2e** at the B3LYP/def2-TZVP level of theory in DMSO phase

Table S6: Experimental and calculated  $^1\text{H}$  NMR chemical shifts ( $\delta$  in ppm) of compound **2f** at the B3LYP/def2-TZVP level of theory in DMSO phase

Table S7: Experimental and calculated  $^1\text{H}$  NMR chemical shifts ( $\delta$  in ppm) of compound **2g** at the B3LYP/def2-TZVP level of theory in DMSO phase

Table S8: Experimental and calculated  $^1\text{H}$  NMR chemical shifts ( $\delta$  in ppm) of compound **2h** at the B3LYP/def2-TZVP level of theory in DMSO phase

Table S9: Experimental and calculated  $^{13}\text{C}$  NMR chemical shifts ( $\delta$  in ppm) of compound **2a** at the B3LYP/def2-TZVP level of theory in DMSO phase

Table S10: Experimental and calculated  $^{13}\text{C}$  NMR chemical shifts ( $\delta$  in ppm) of compound **2b** at the B3LYP/def2-TZVP level of theory in DMSO phase

Table S11: Experimental and calculated  $^{13}\text{C}$  NMR chemical shifts ( $\delta$  in ppm) of compound **2c** at the B3LYP/def2-TZVP level of theory in DMSO phase

Table S12: Experimental and calculated  $^{13}\text{C}$  NMR chemical shifts ( $\delta$  in ppm) of compound **2d** at the B3LYP/def2-TZVP level of theory in DMSO phase

Table S13: Experimental and calculated  $^{13}\text{C}$  NMR chemical shifts ( $\delta$  in ppm) of compound **2e** at the B3LYP/def2-TZVP level of theory in DMSO phase

Table S14: Experimental and calculated  $^{13}\text{C}$  NMR chemical shifts ( $\delta$  in ppm) of compound **2f** at the B3LYP/def2-TZVP level of theory in DMSO phase

Table S15: Experimental and calculated  $^{13}\text{C}$  NMR chemical shifts ( $\delta$  in ppm) of compound **2g** at the B3LYP/def2-TZVP level of theory in DMSO phase

Table S16: Experimental and calculated  $^{13}\text{C}$  NMR chemical shifts ( $\delta$  in ppm) of compound **2h** at the B3LYP/def2-TZVP level of theory in DMSO phase

Table S17: Comparative overview of reported catalytic systems for the synthesis of pyrano[2,3-d]pyrimidinone derivatives under different reaction conditions, along with the present  $\text{Ag}_2\text{WO}_4$ -catalyzed protocol.

Table S18: Structure-Activity Relationship (SAR) analysis of synthesized pyrano[2,3-d]pyrimidinone derivatives (2a-2h) against the A549 cell line, correlating  $\text{IC}_{50}$  values, physicochemical descriptors, and docking scores with substituent effects

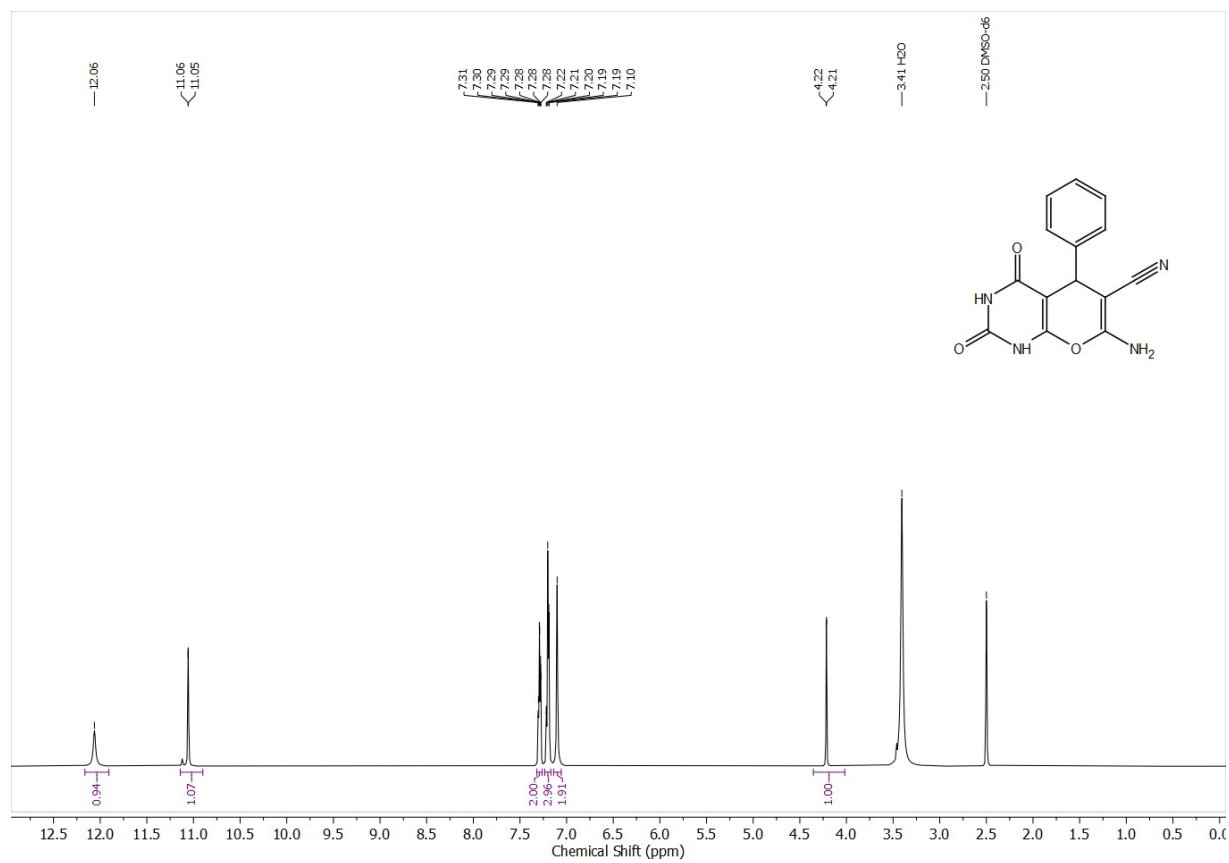

**Fig. S1.**  $^1\text{H}$  NMR spectrum of **compound 2a** recorded in  $\text{DMSO}-d_6$  (600 MHz).

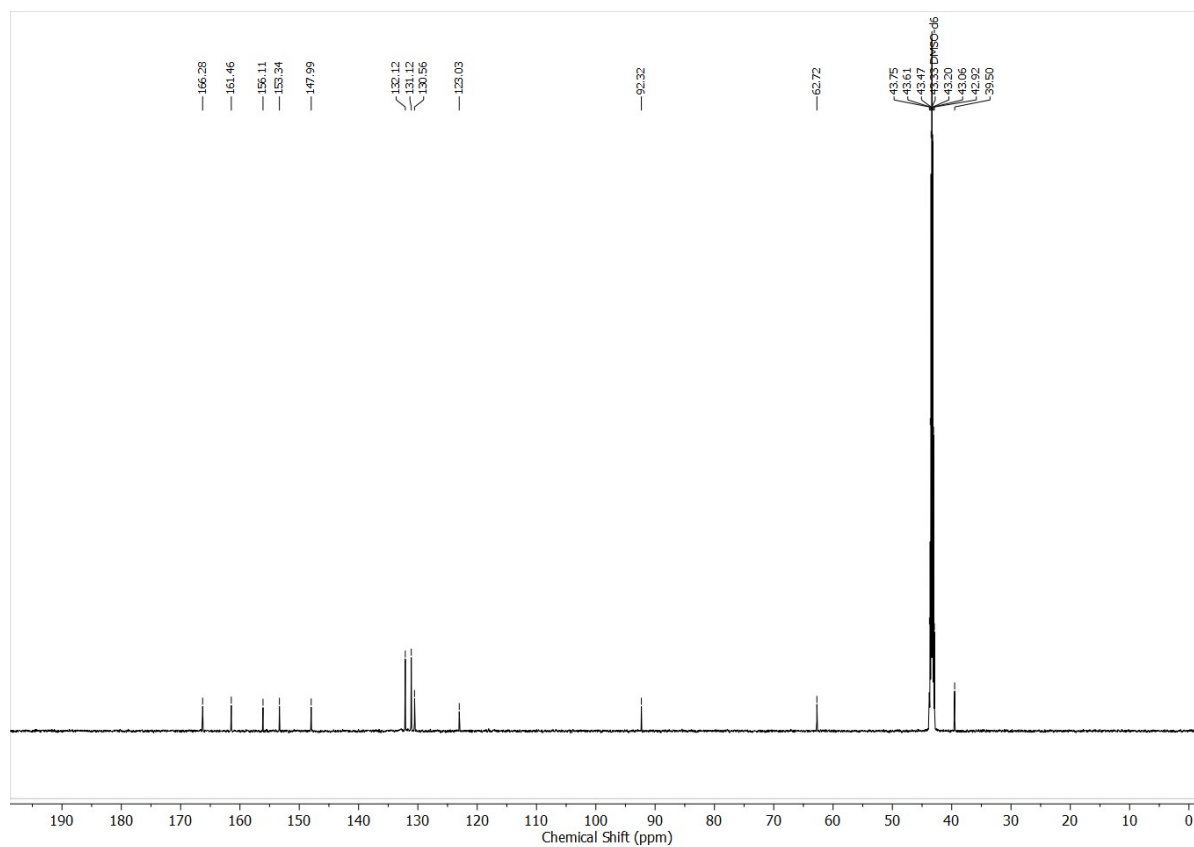

**Fig. S2.** <sup>13</sup>C NMR spectrum of *compound 2a* in DMSO-*d*<sub>6</sub> (151 MHz).

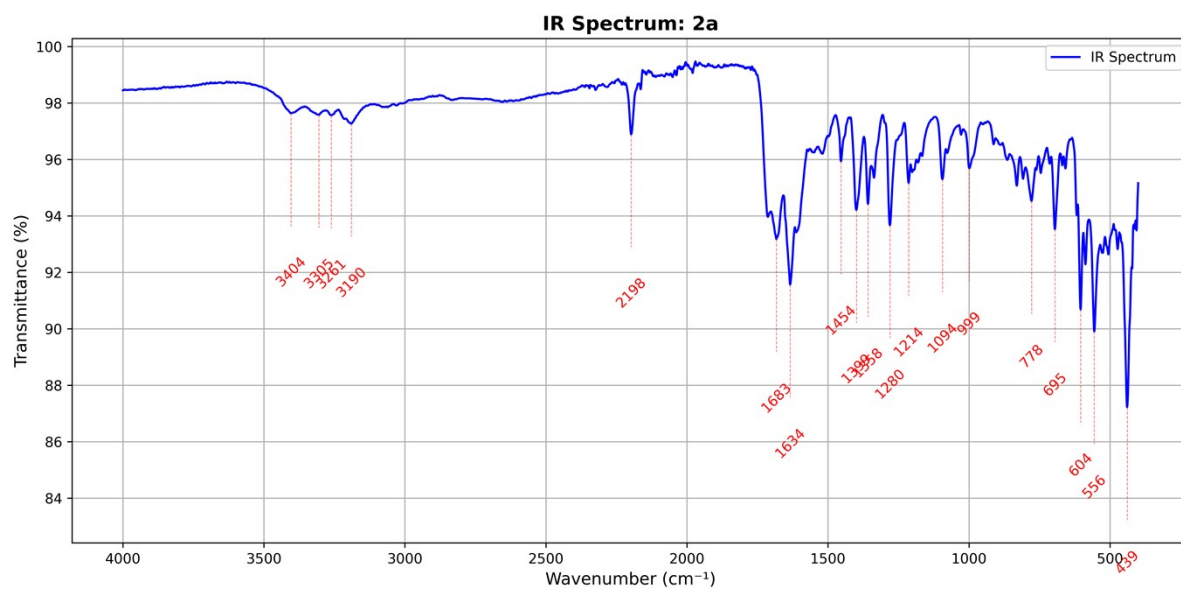

***Fig. S3. IR spectrum of compound 2a (FT-IR).***

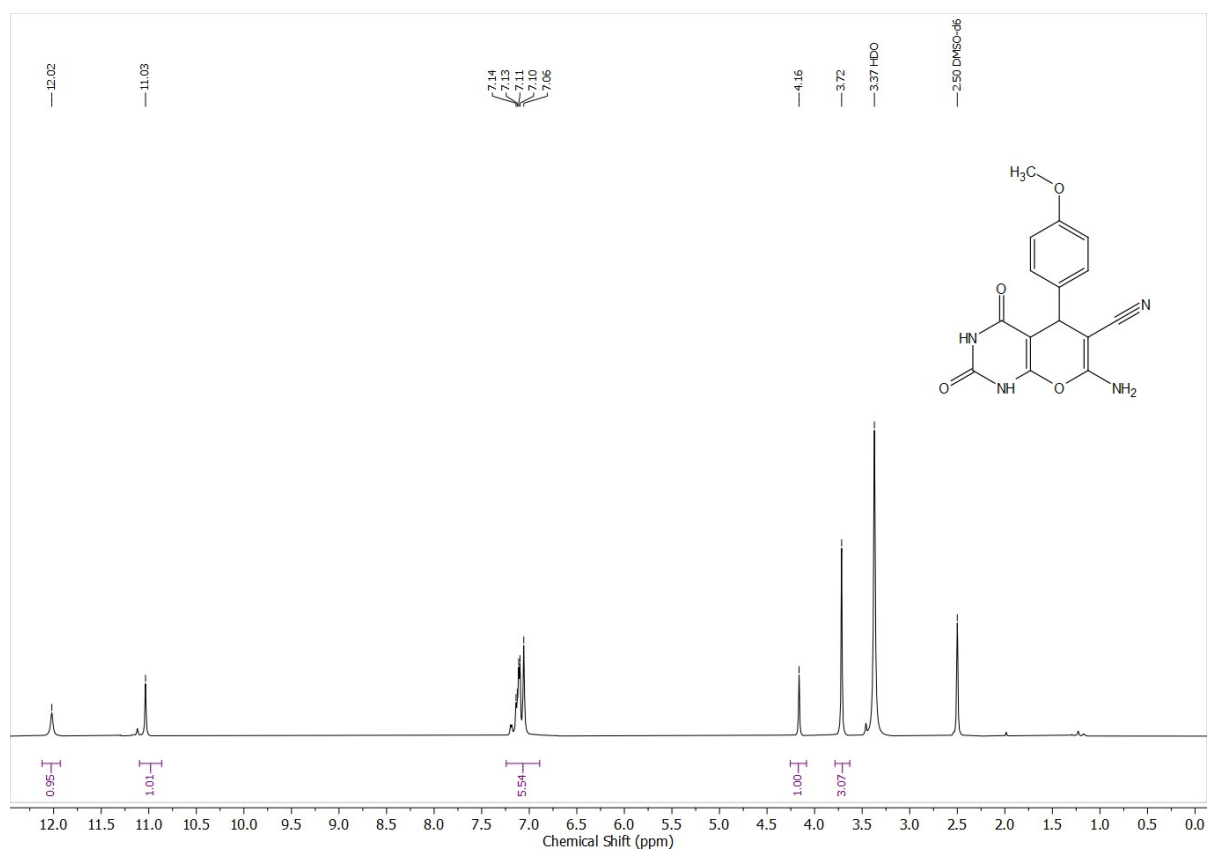

**Fig. S4.**  $^1\text{H}$  NMR spectrum of **compound 2b** recorded in  $\text{DMSO}-d_6$  (600 MHz).



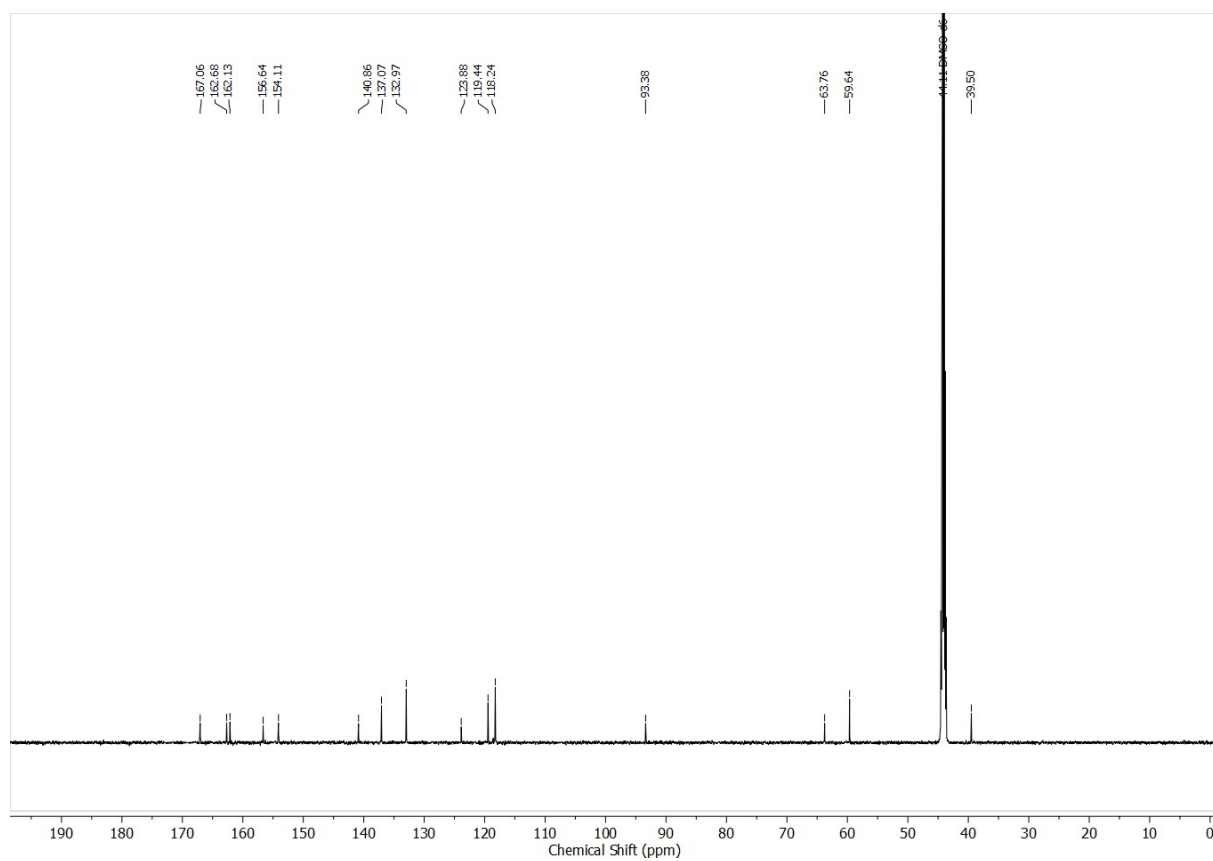

**Fig. S5.** <sup>13</sup>C NMR spectrum of compound **2b** in DMSO-*d*<sub>6</sub> (151 MHz).

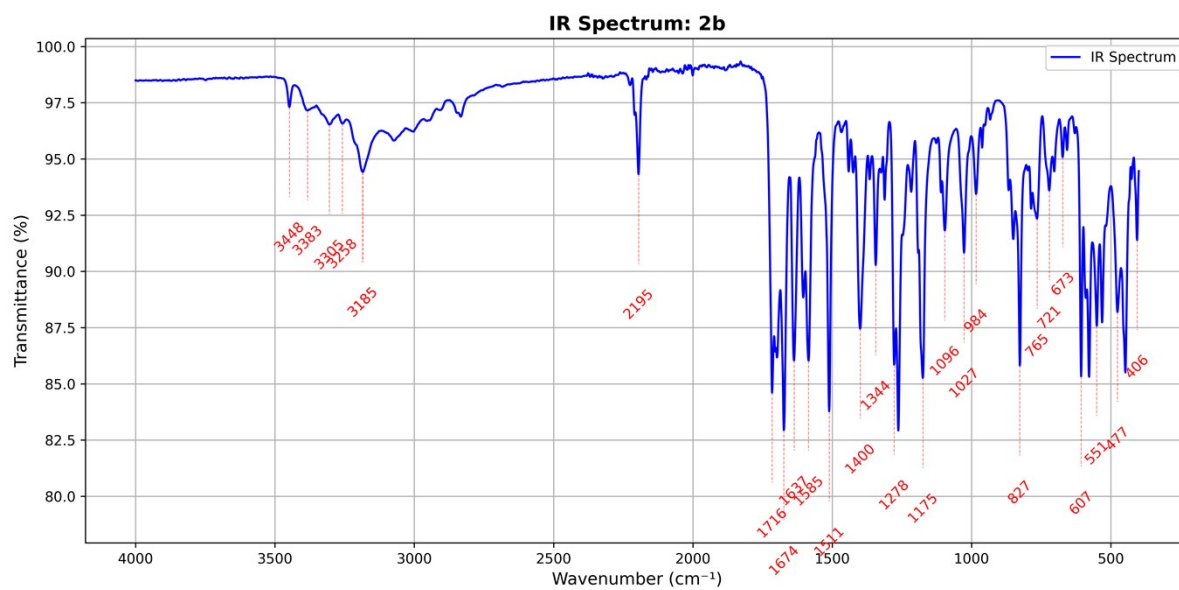

**Fig. S6.** IR spectrum of compound **2b** (FT-IR).

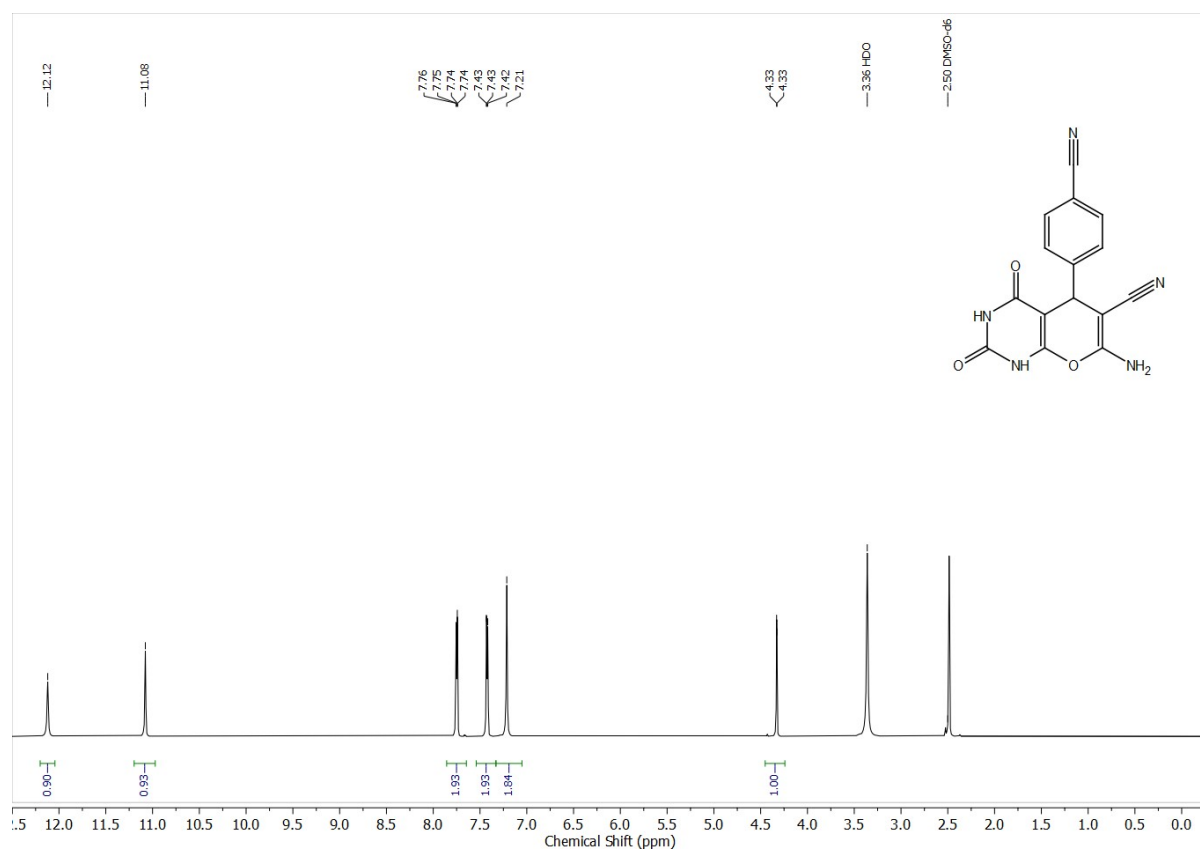

**Fig. S7.**  $^1\text{H}$  NMR spectrum of **compound 2c** recorded in  $\text{DMSO-}d_6$  (600 MHz).

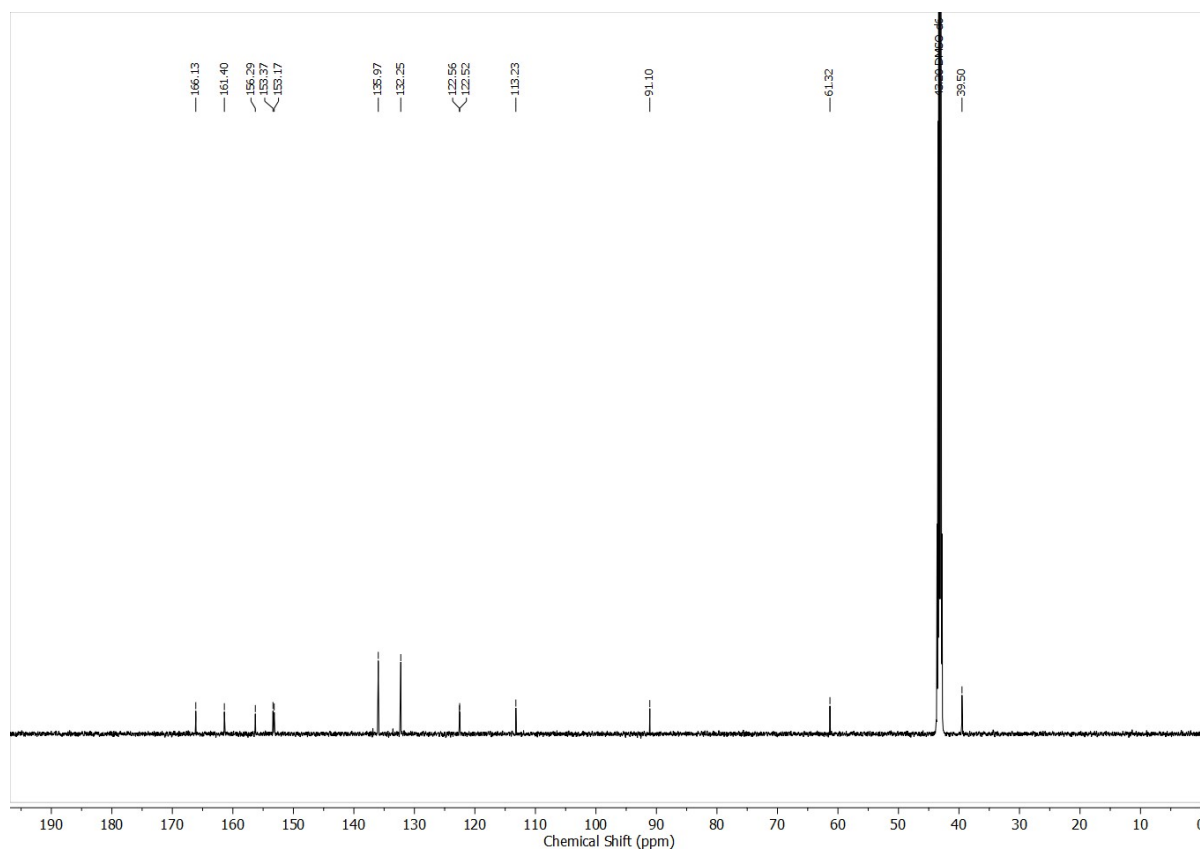

**Fig. S8.**  $^{13}\text{C}$  NMR spectrum of **compound 2c** in  $\text{DMSO-}d_6$  (151 MHz).

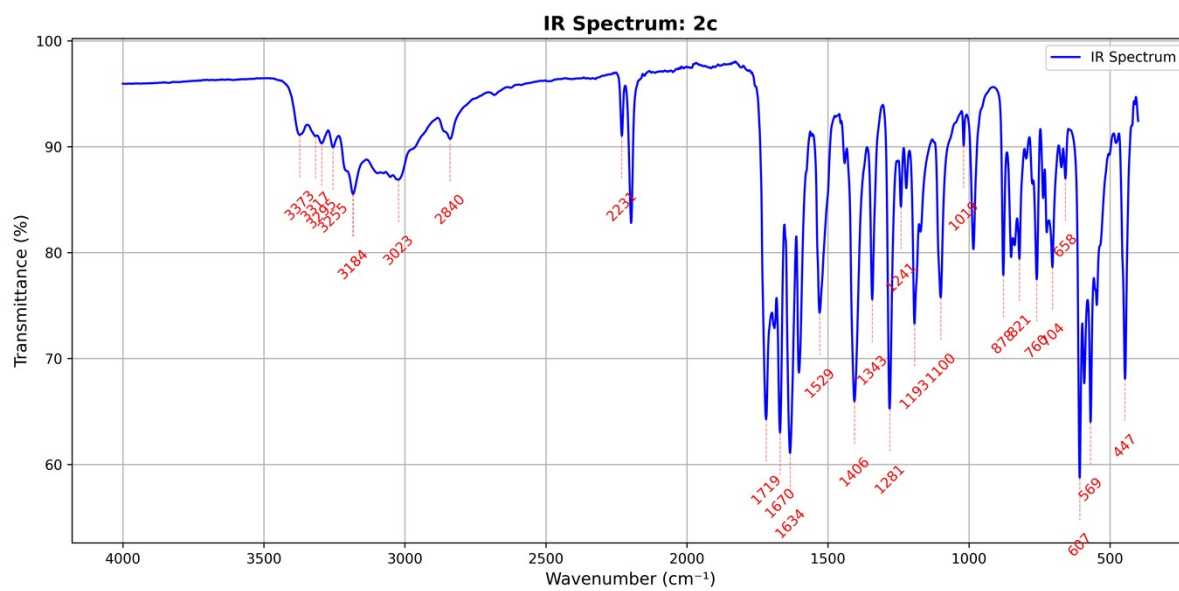

**Fig. S9.** IR spectrum of *compound 2c* (FT-IR).

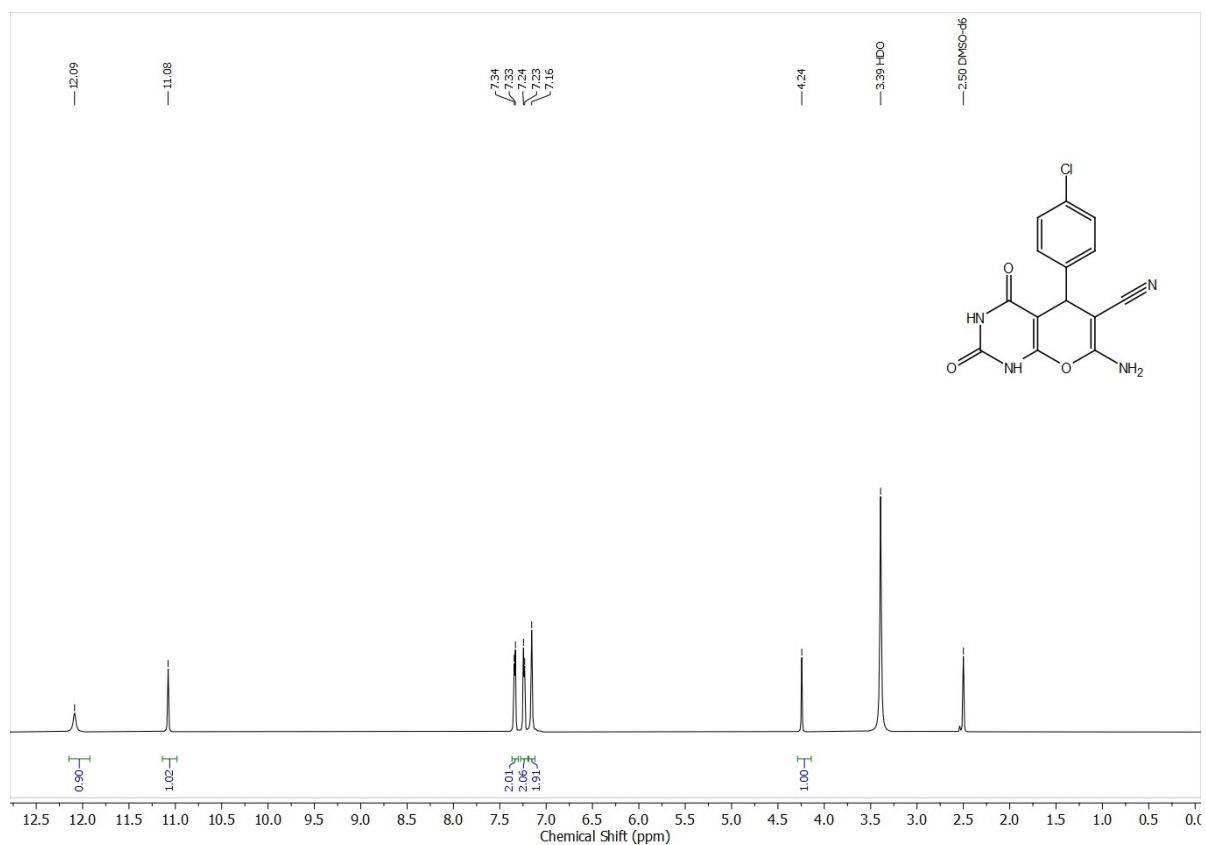

**Fig. S10.**  $^1\text{H}$  NMR spectrum of **compound 2d** recorded in  $\text{DMSO-}d_6$  (600 MHz).

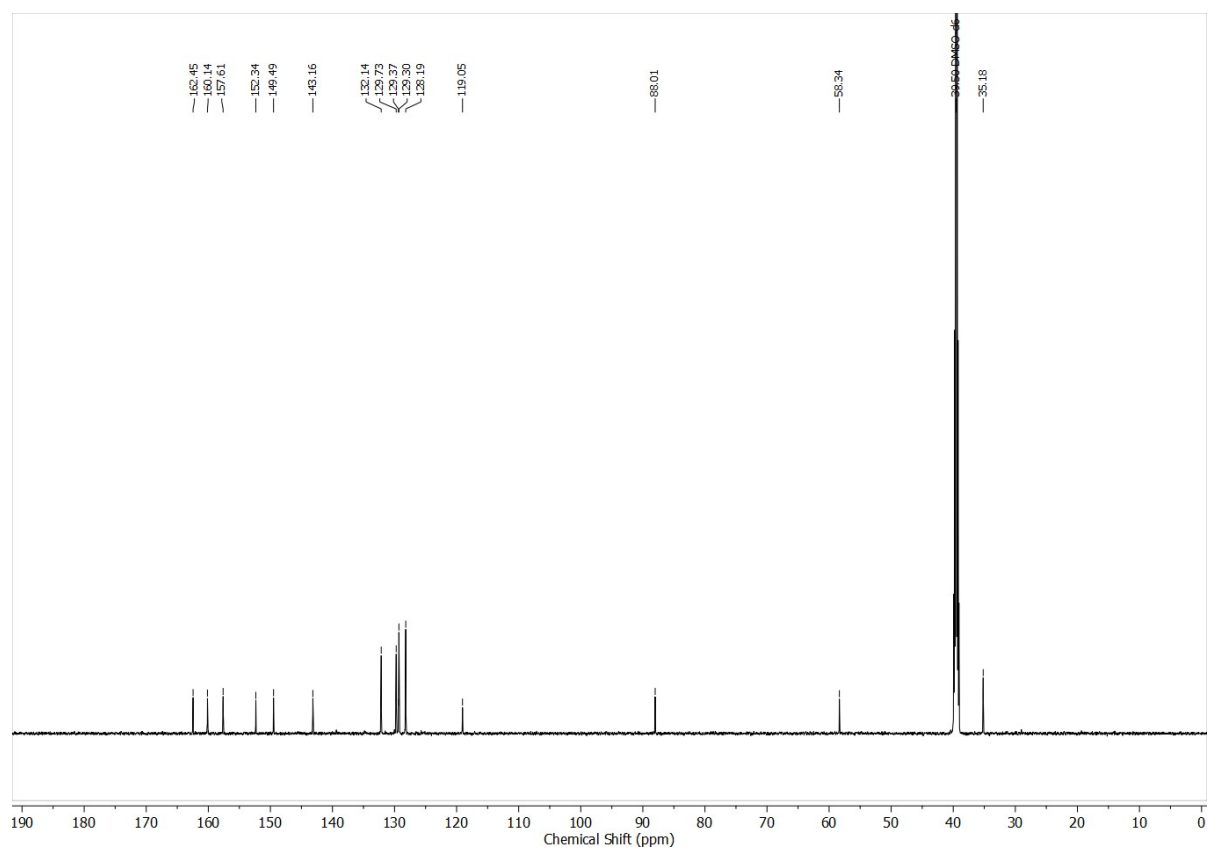

**Fig. S11.**  $^{13}\text{C}$  NMR spectrum of **compound 2d** in  $\text{DMSO-}d_6$  (151 MHz).

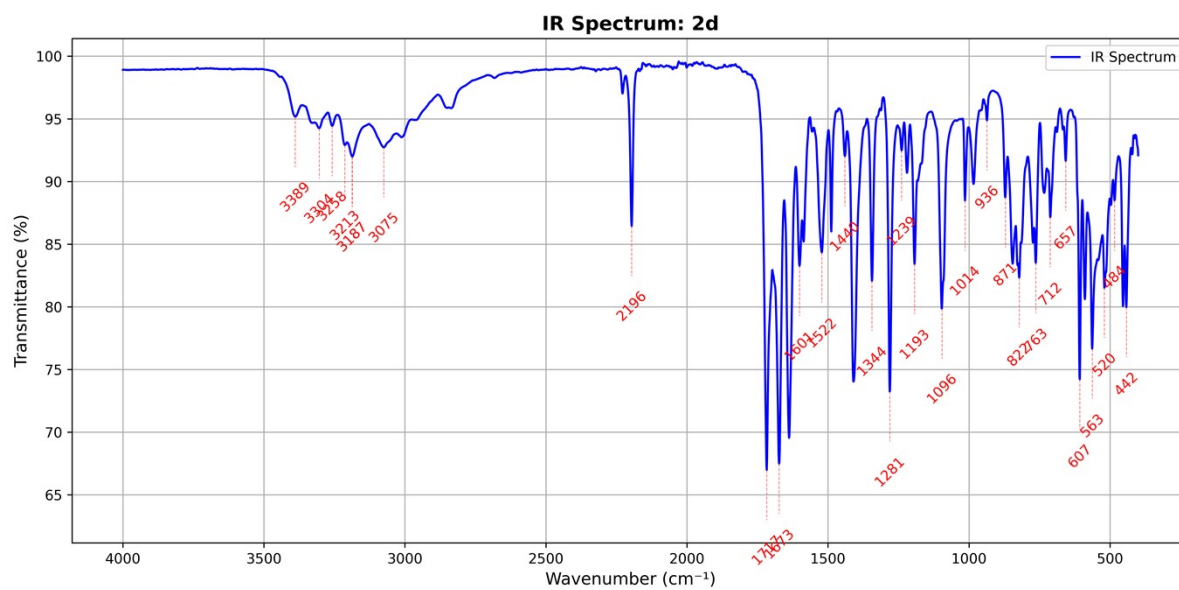

**Fig. S12.** IR spectrum of compound 2d (FT-IR).



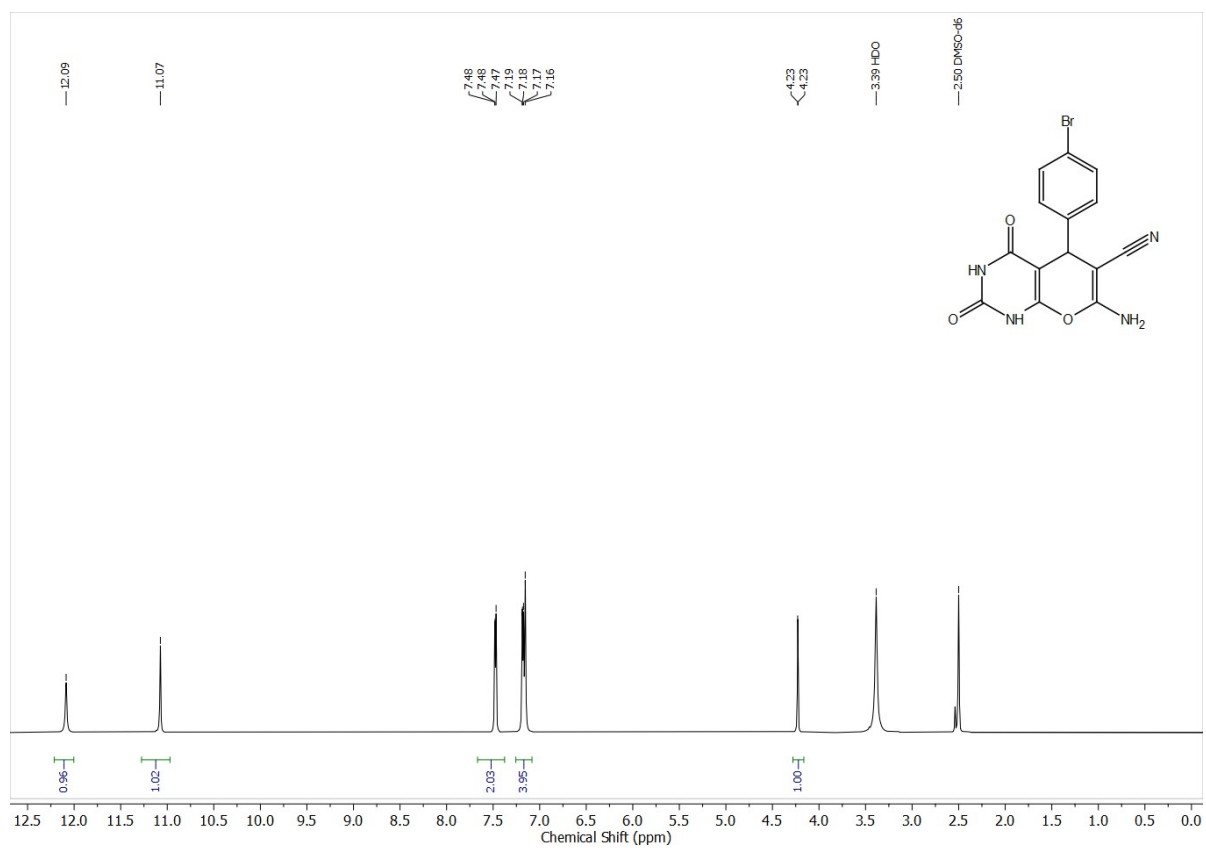

**Fig. S13.** <sup>1</sup>H NMR spectrum of **compound 2e** recorded in DMSO-*d*<sub>6</sub> (600 MHz).

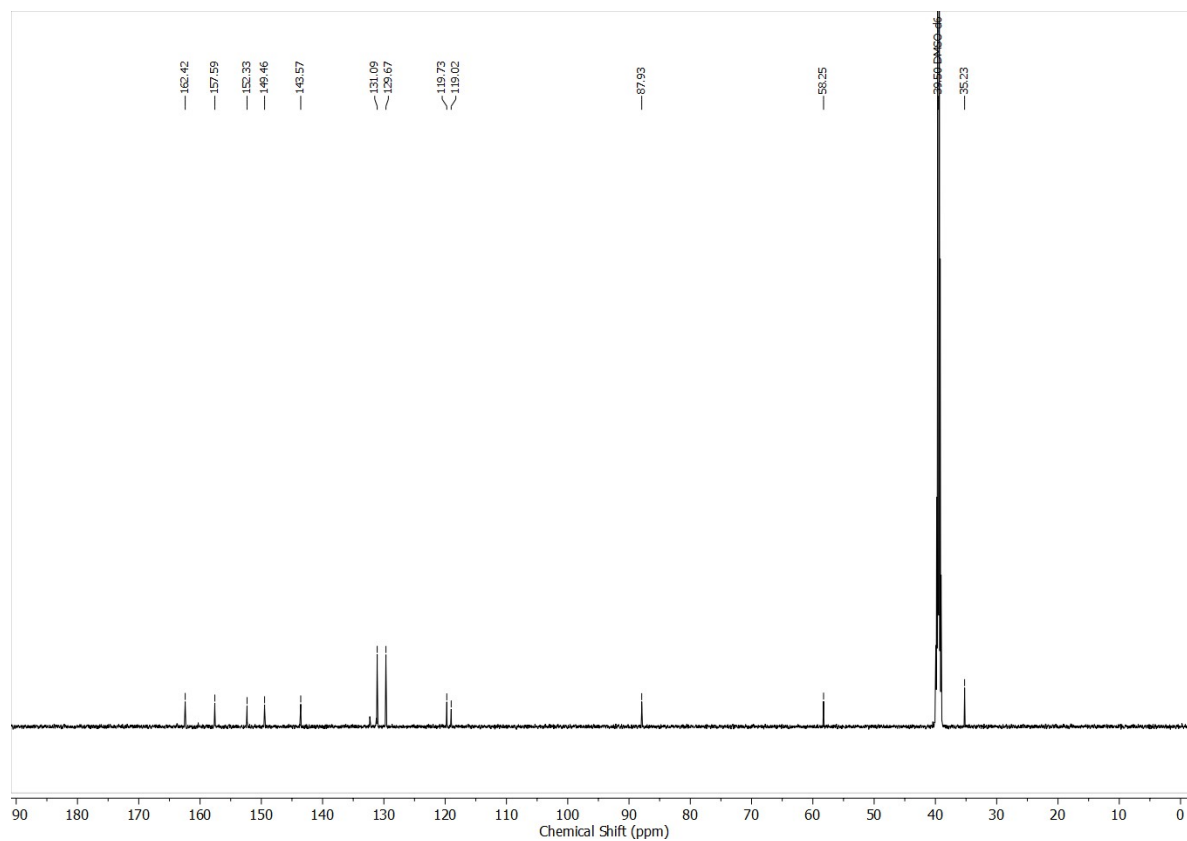

**Fig. S14.** <sup>13</sup>C NMR spectrum of **compound 2e** in DMSO-*d*<sub>6</sub> (151 MHz).

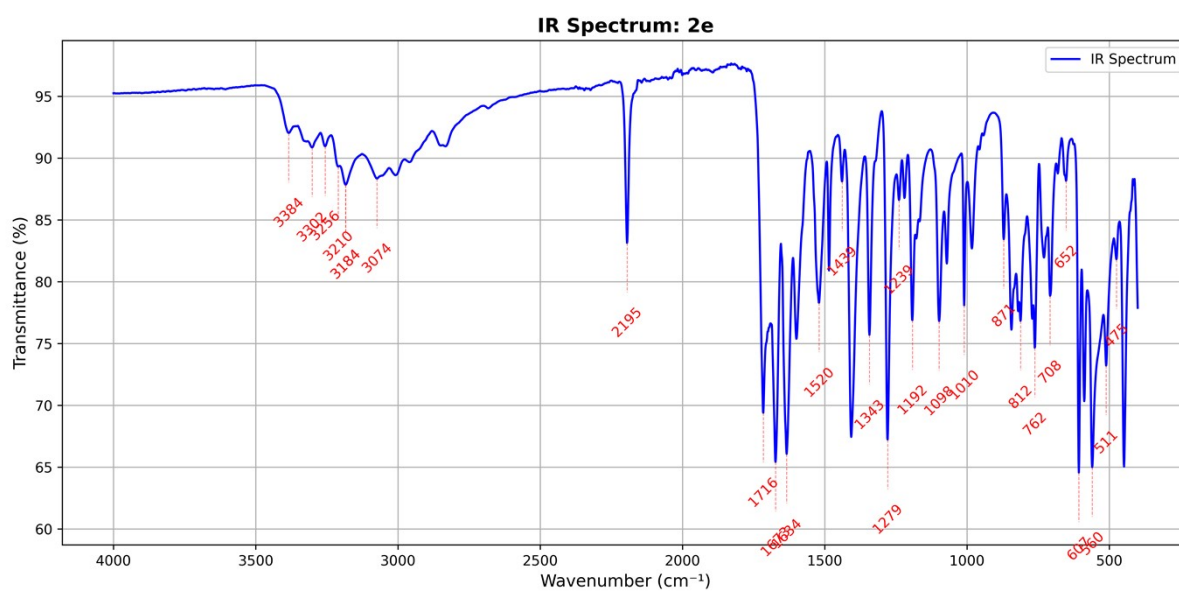

**Fig. S15.** IR spectrum of compound **2e** (FT-IR).

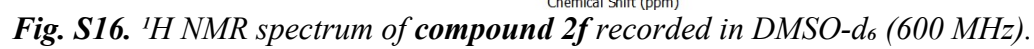

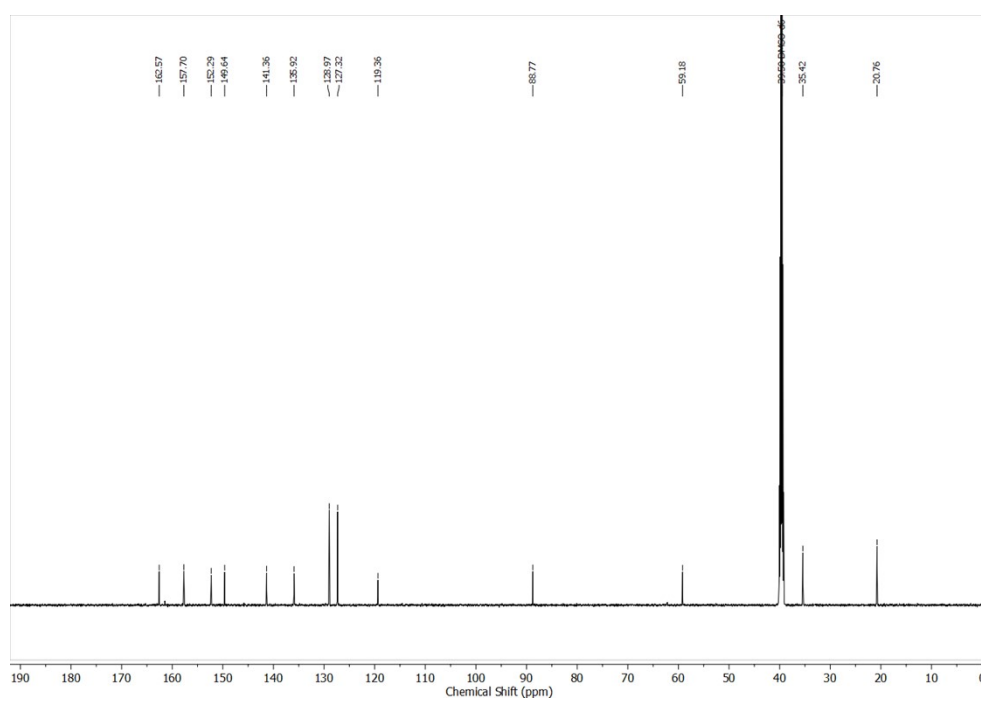

**Fig. S17.**  $^{13}\text{C}$  NMR spectrum of **compound 2f** in  $\text{DMSO-}d_6$  (151 MHz).

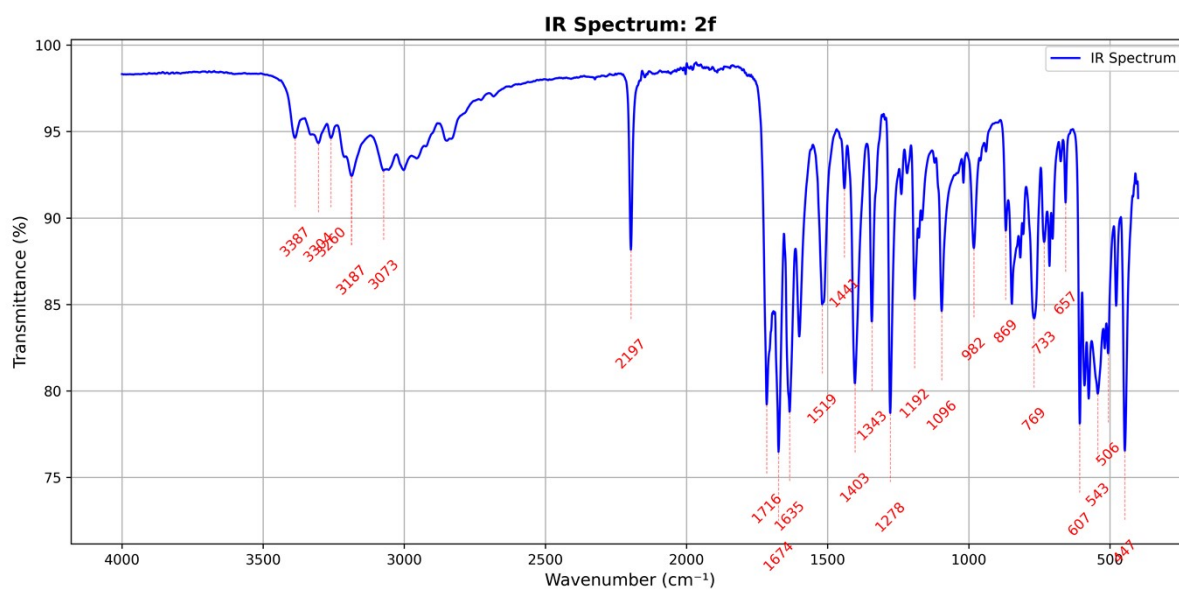

**Fig. S18.** IR spectrum of *compound 2f* (FT-IR).

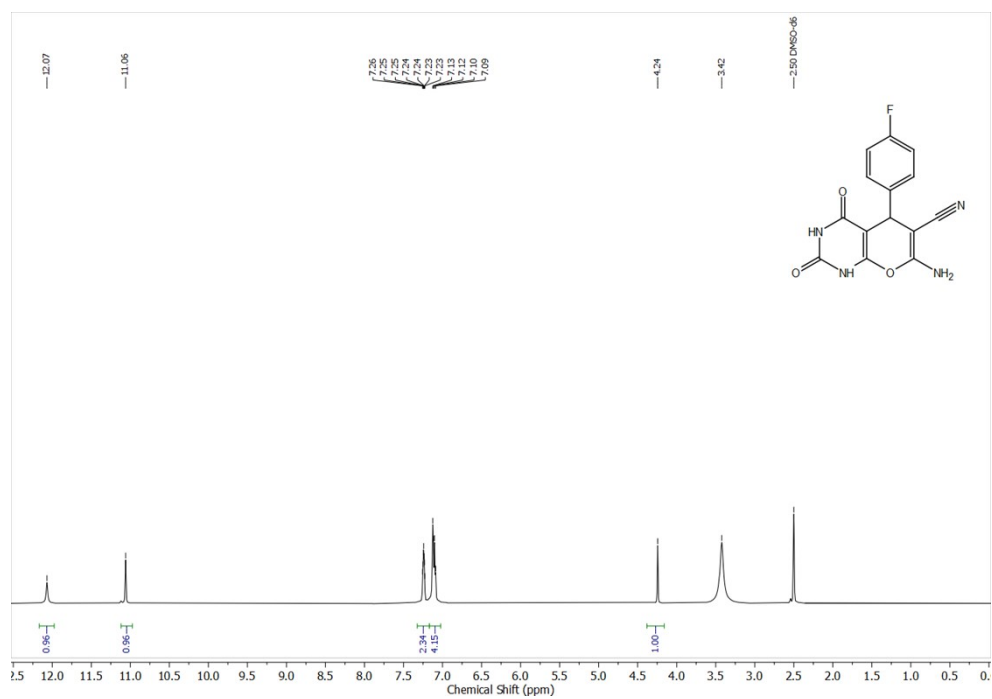

**Fig. S19.**  $^1\text{H}$  NMR spectrum of compound **2g** recorded in  $\text{DMSO-}d_6$  (400 MHz).

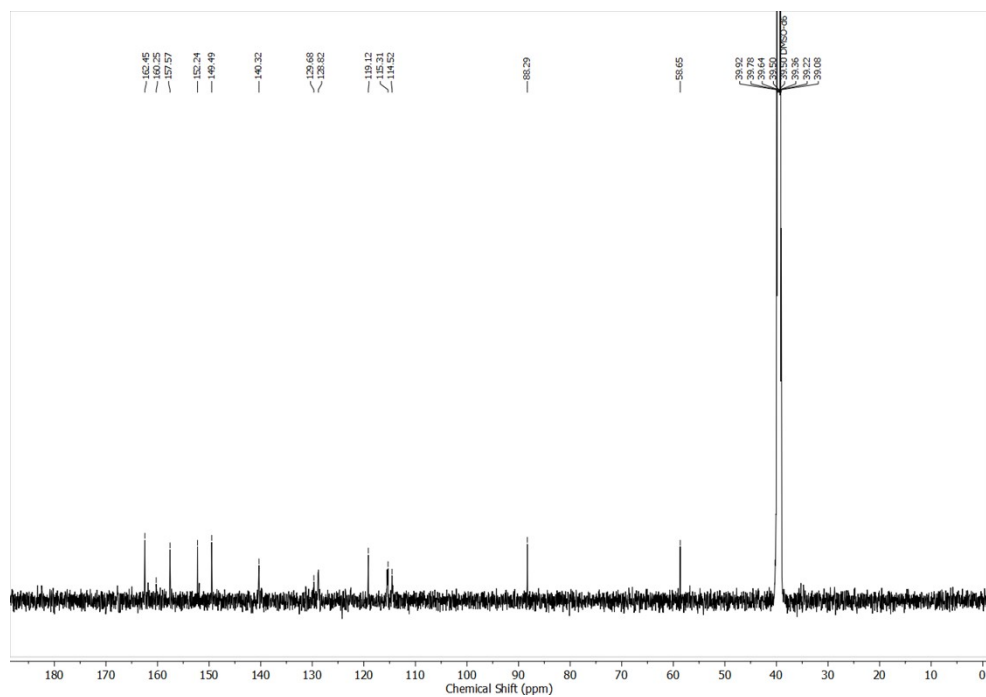

**Fig. S20.** <sup>13</sup>C NMR spectrum of compound 2g in DMSO-d<sub>6</sub> (151 MHz).



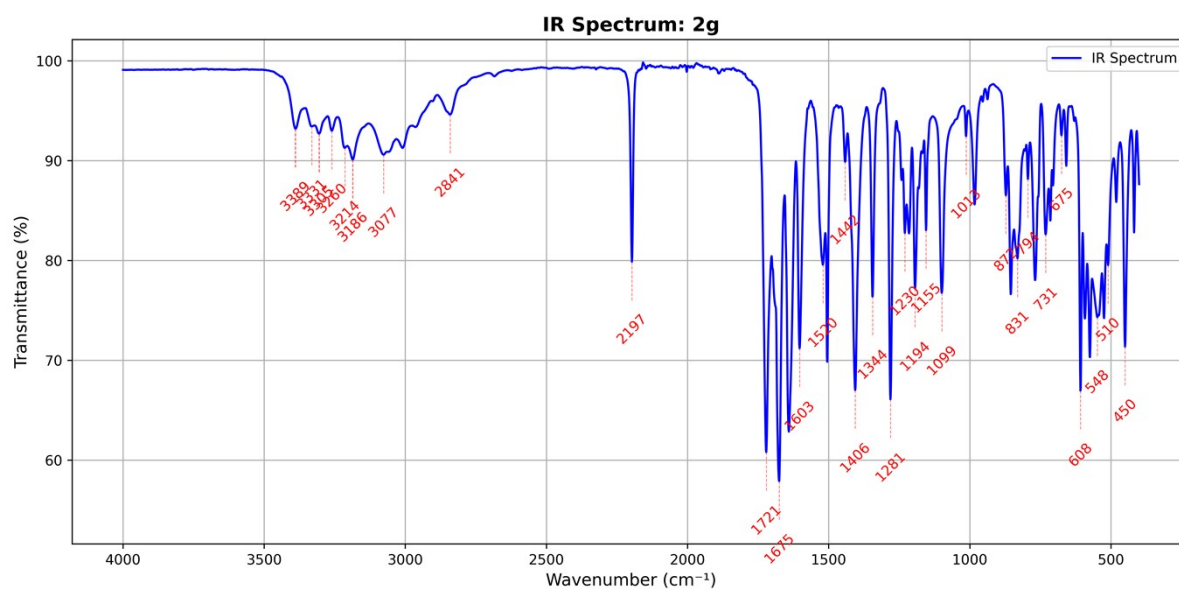

**Fig. S21.** IR spectrum of compound **2g** (FT-IR).

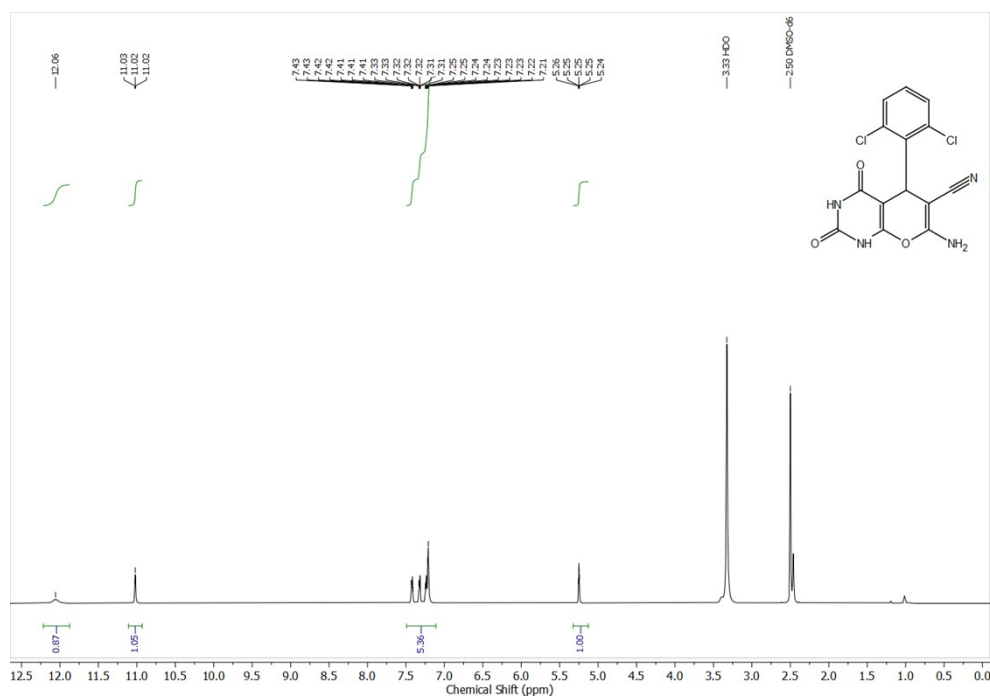

**Fig. S22.**  $^1\text{H}$  NMR spectrum of compound **2h** recorded in  $\text{DMSO}-d_6$  (600 MHz).

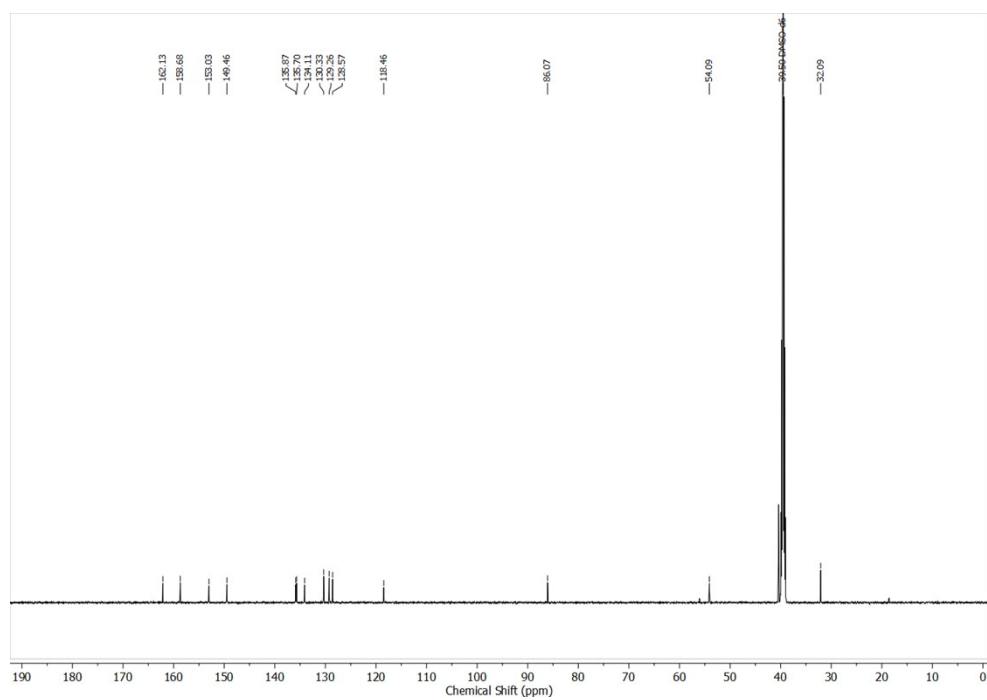

**Fig. S23.**  $^{13}\text{C}$  NMR spectrum of **compound 2h** in  $\text{DMSO-d}_6$  (151 MHz).

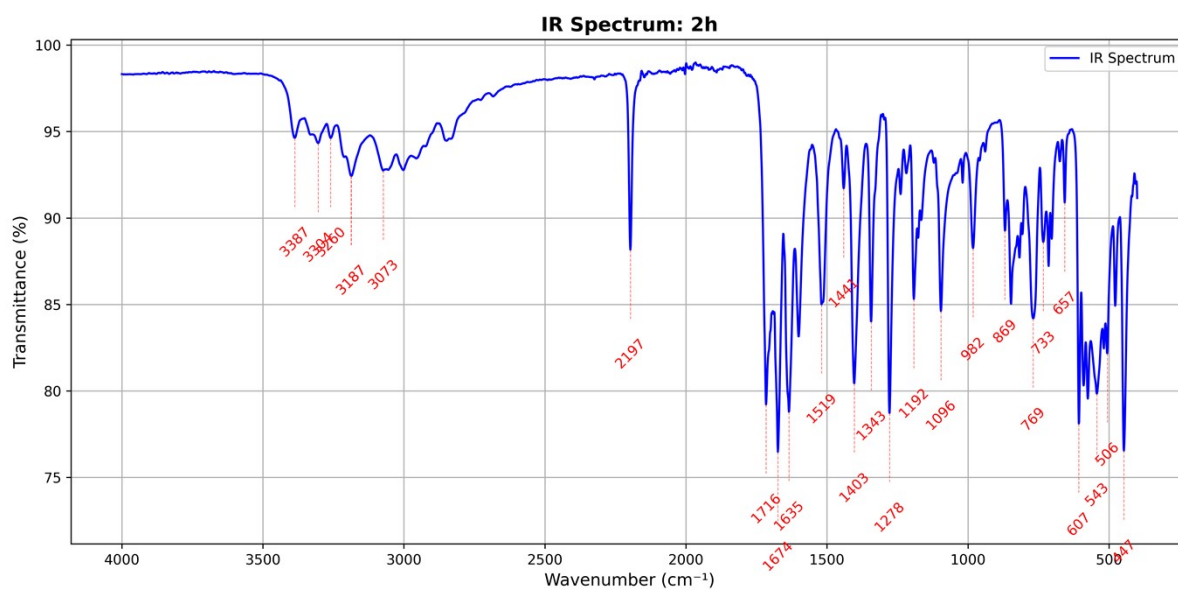

**Fig. S24.** IR spectrum of compound **2h** (FT-IR).

**Fig. S25** Comparative IR spectra of compound **2a**: experimental (black) vs theoretical (red) transmittance. Theoretical spectrum was computed using DFT (B3LYP/def2-TZVP) and plotted with a Gaussian convolution to simulate peak broadening.

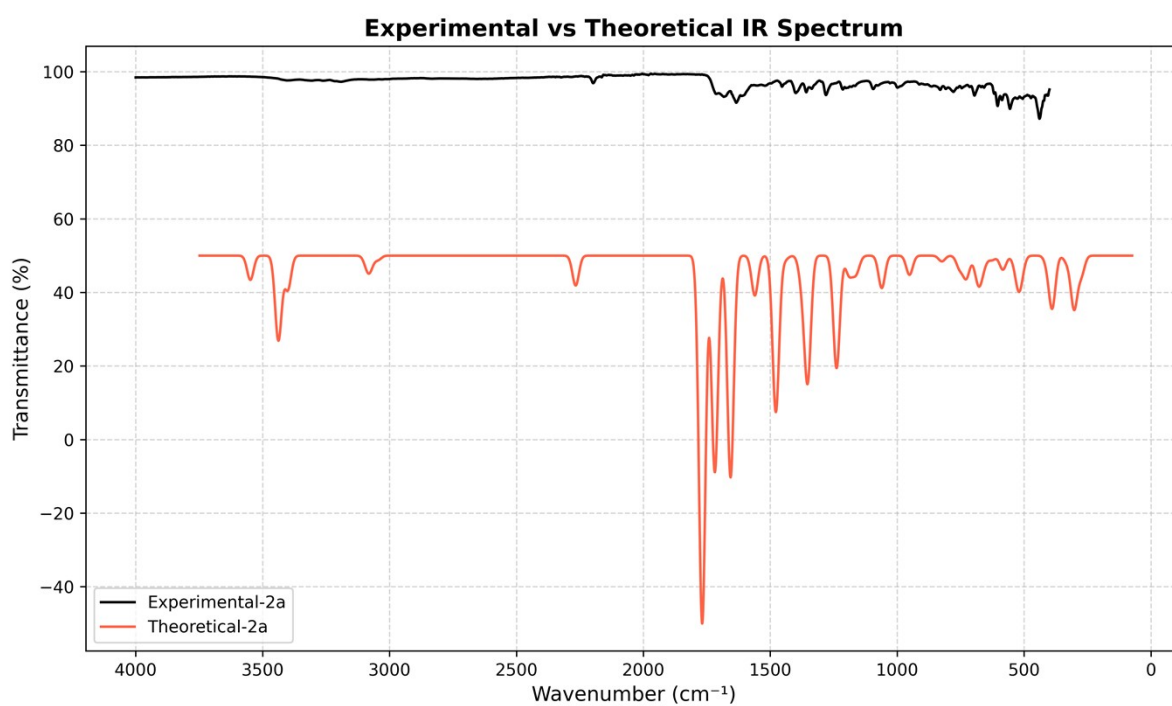



**Fig. S26** Comparative IR spectra of compound **2b**: experimental (black) vs theoretical (red) transmittance. Theoretical spectrum was computed using DFT (B3LYP/def2-TZVP) and plotted with a Gaussian convolution to simulate peak broadening.

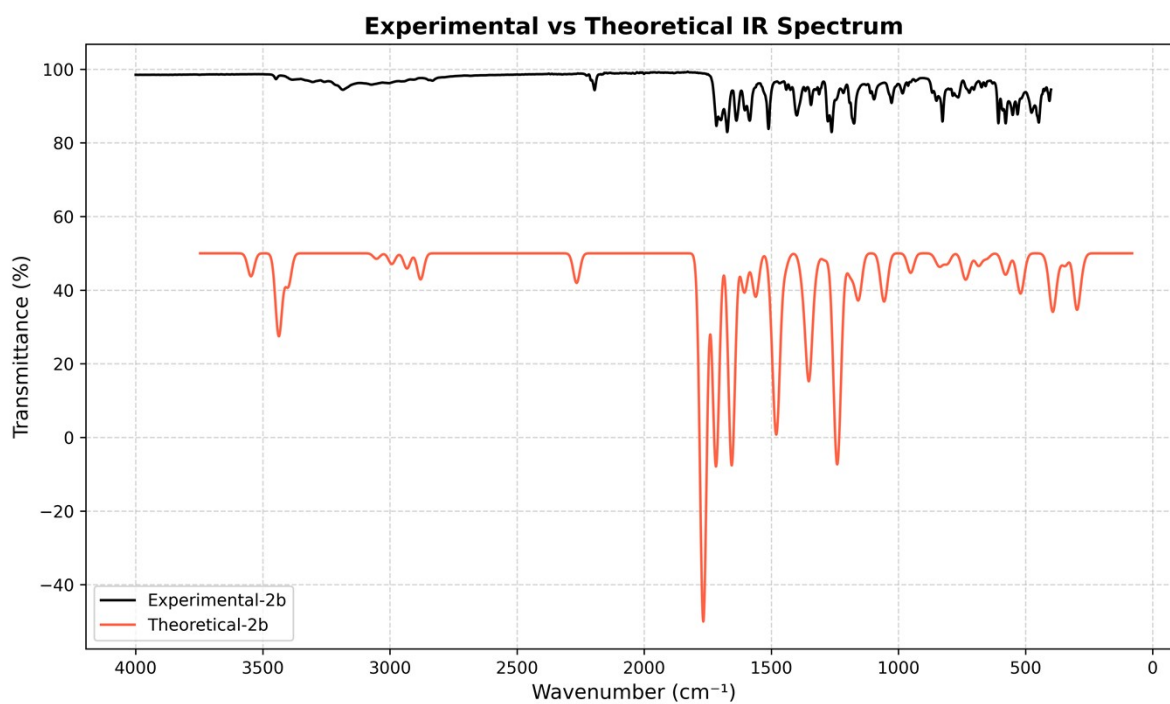





**Fig. S27** Comparative IR spectra of compound **2c**: experimental (black) vs theoretical (red) transmittance. Theoretical spectrum was computed using DFT (B3LYP/def2-TZVP) and plotted with a Gaussian convolution to simulate peak broadening.

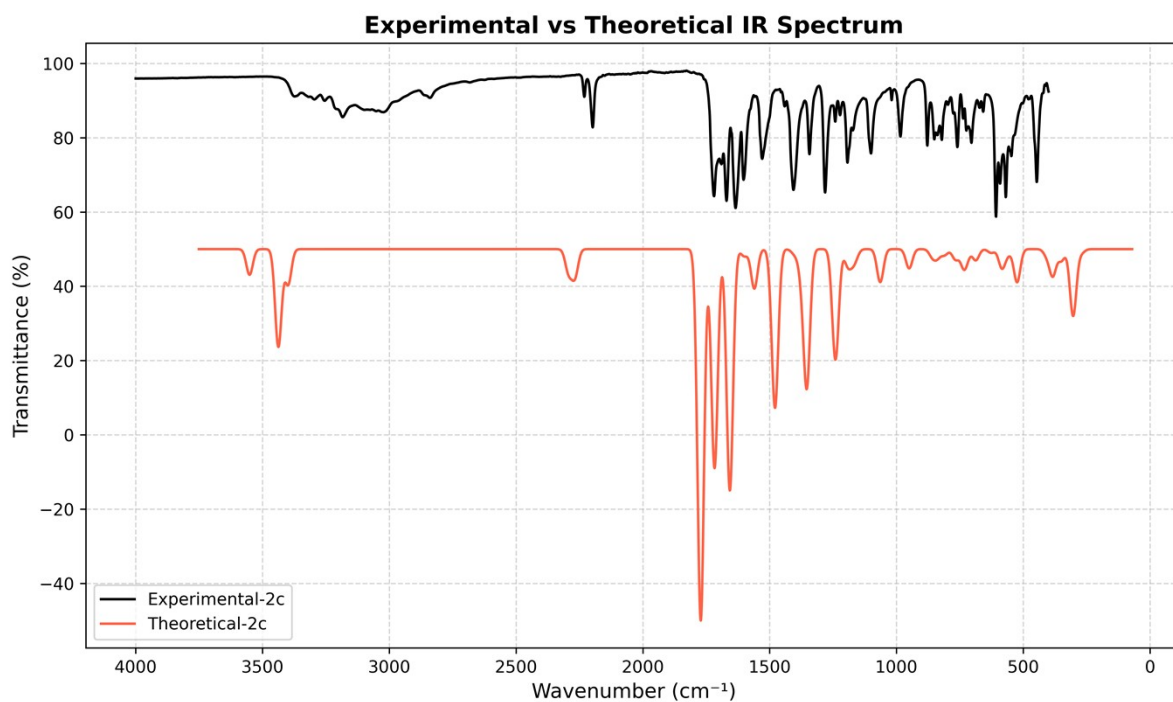

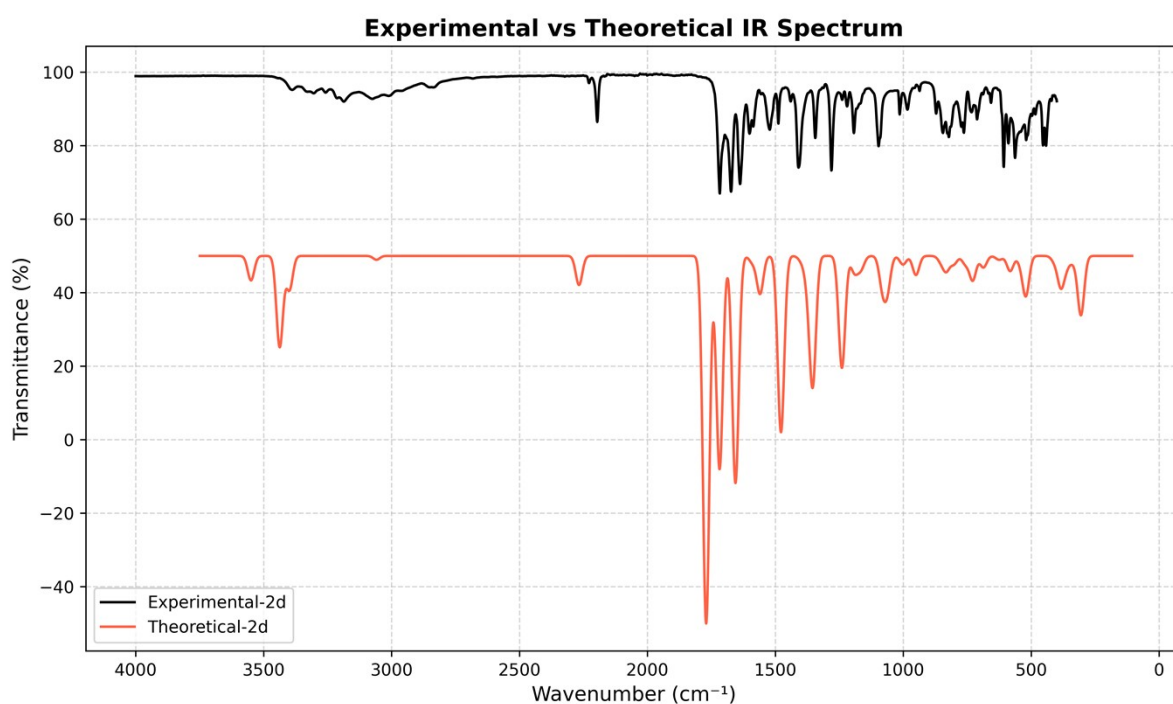

**Fig. S28** Comparative IR spectra of compound **2d**: experimental (black) vs theoretical (red) transmittance. Theoretical spectrum was computed using DFT (B3LYP/def2-TZVP) and plotted with a Gaussian convolution to simulate peak broadening.

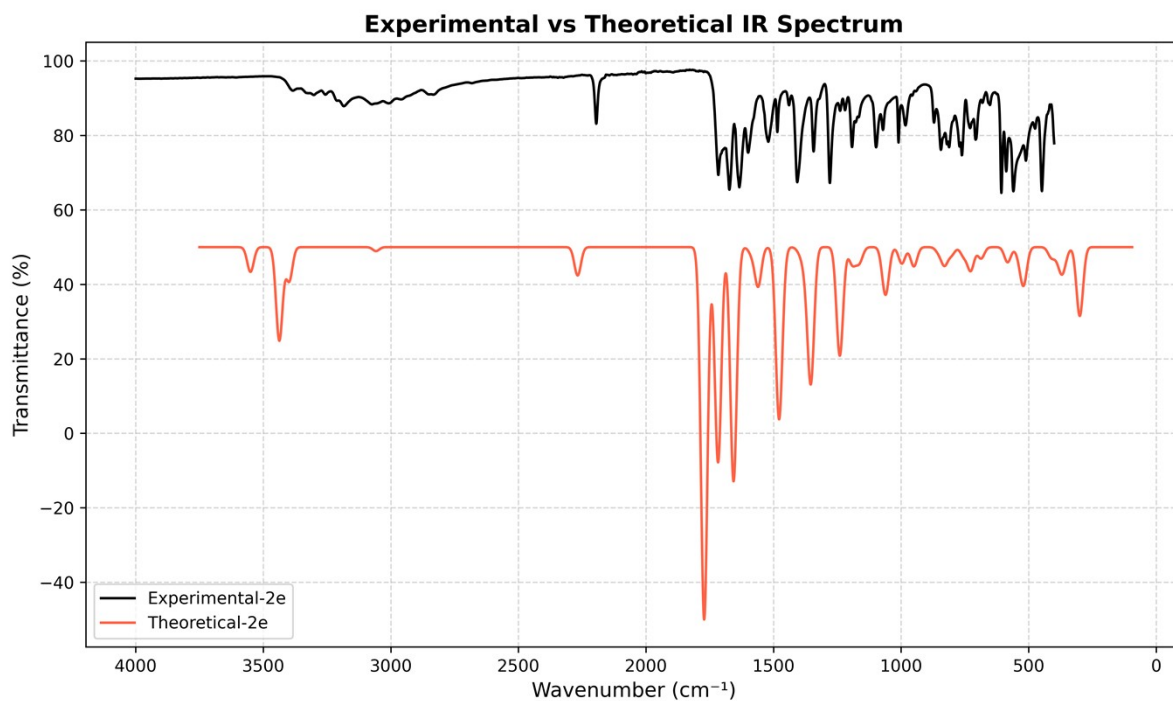

**Fig. S29.** Comparative IR spectra of compound **2e**: experimental (black) vs theoretical (red) transmittance. Theoretical spectrum was computed using DFT (B3LYP/def2-TZVP) and plotted with a Gaussian convolution to simulate peak broadening.

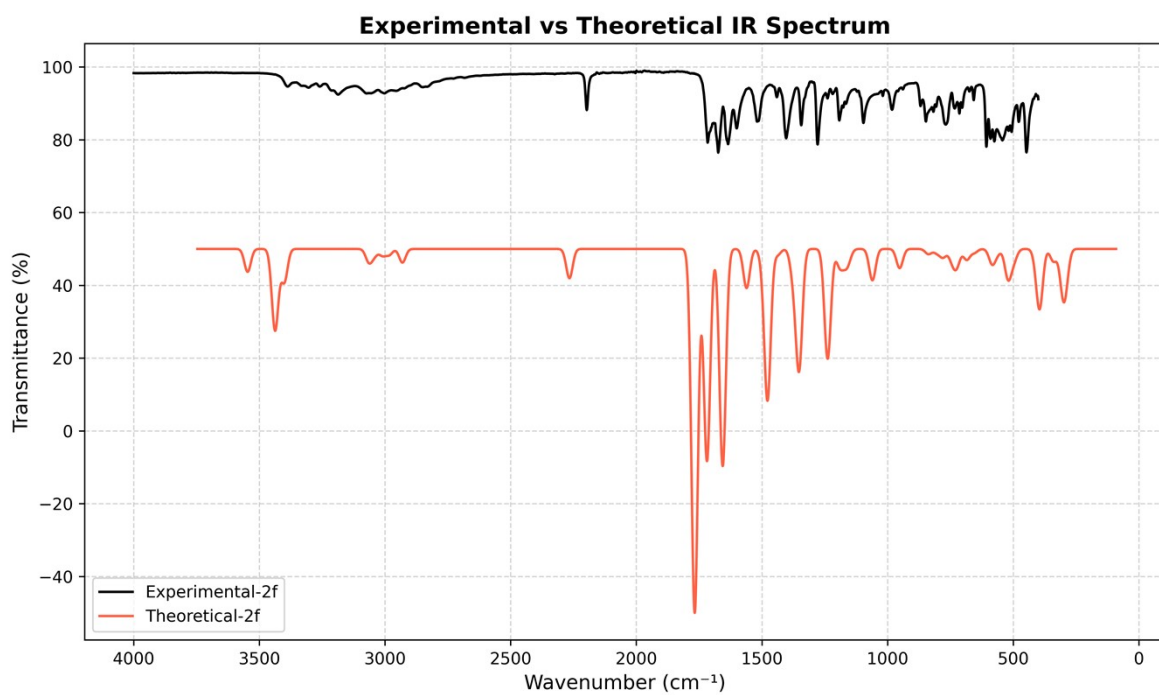

**Fig. S30.** Comparative IR spectra of compound **2f**: experimental (black) vs theoretical (red) transmittance. Theoretical spectrum was computed using DFT (B3LYP/def2-TZVP) and plotted with a Gaussian convolution to simulate peak broadening.

**Fig. S31.** Comparative IR spectra of compound **2g**: experimental (black) vs theoretical (red) transmittance. Theoretical spectrum was computed using DFT (B3LYP/def2-TZVP) and plotted with a Gaussian convolution to simulate peak broadening.

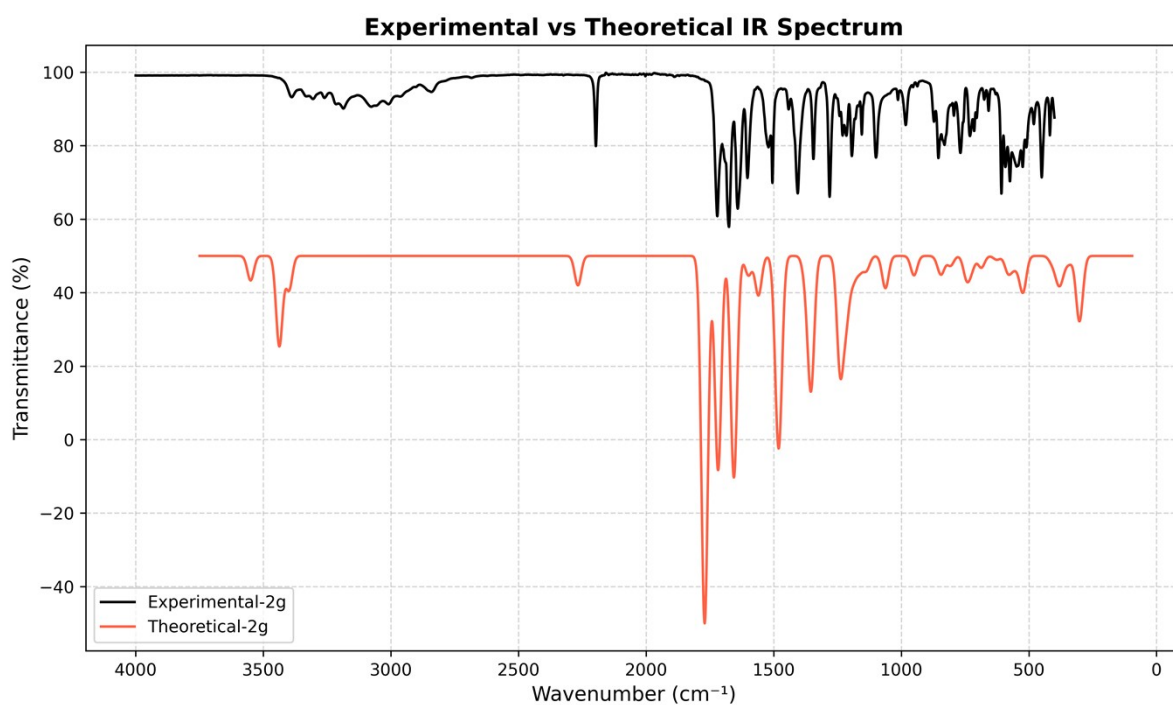

**Fig. S32** Comparative IR spectra of compound **2h**: experimental (black) vs theoretical (red) transmittance. Theoretical spectrum was computed using DFT (B3LYP/def2-TZVP) and plotted with a Gaussian convolution to simulate peak broadening.

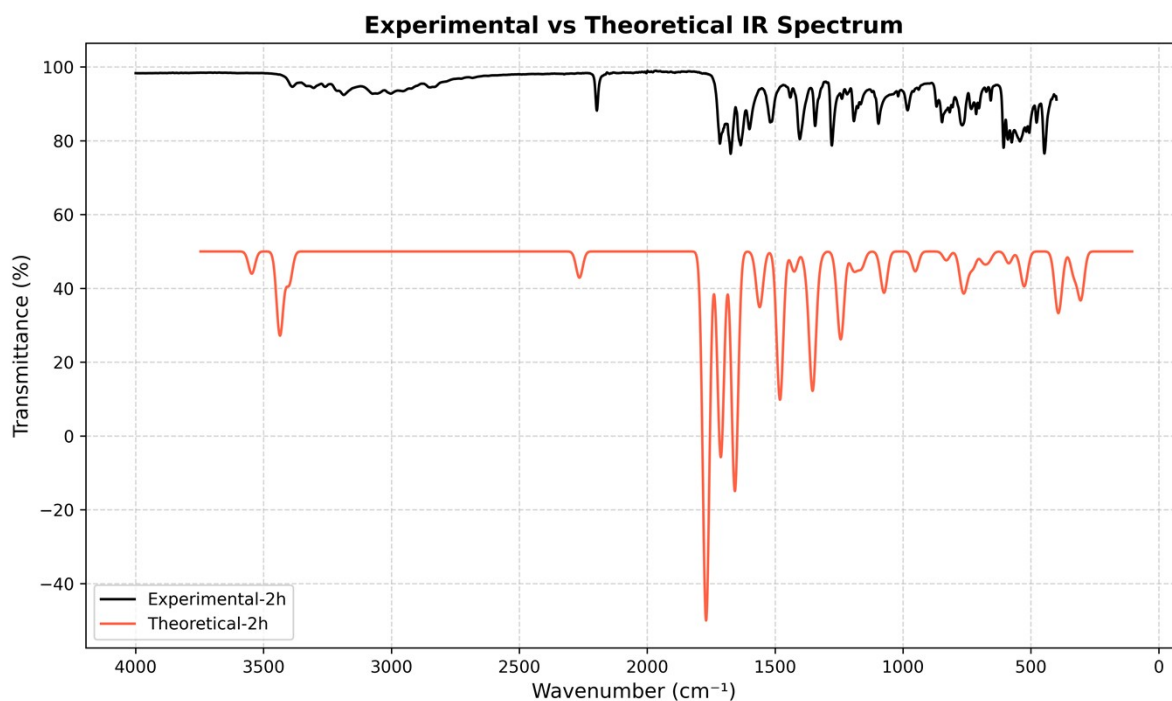

| Code | Optimised structure                                                                 | HOMO                                                                                | LUMO                                                                                 | MEP                                                                                   |
|------|-------------------------------------------------------------------------------------|-------------------------------------------------------------------------------------|--------------------------------------------------------------------------------------|---------------------------------------------------------------------------------------|
| 2a   | 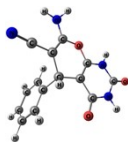 |   |   |   |
| 2b   |  |  |  |  |
| 2c   |  |  |  |  |
| 2d   |  |  |  |  |
| 2e   |  |  |  |  |
| 2f   |  |  |  |  |

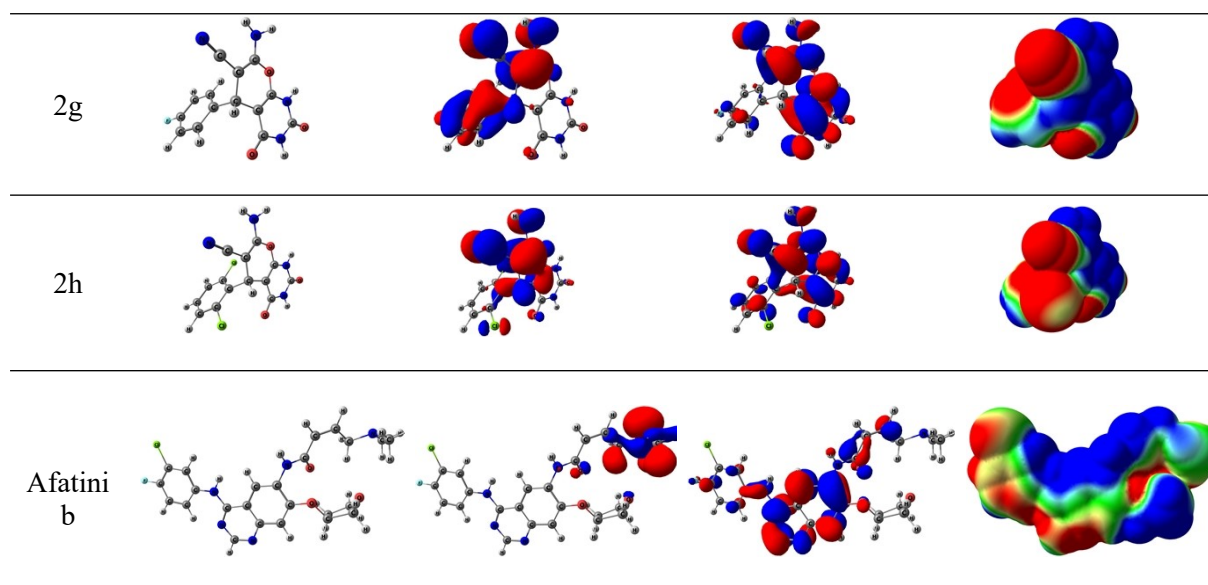

**Fig. S33** (HOMO, LUMO) orbitals, Molecular Electrostatic Potential plots (MEP) and optimized structures (2a–2h and afatinib) at B3LYP/def2-TZVP level in gas phase.

**Fig. S34.** 2D interaction diagrams of ligands docked into the active site of the (PDB ID: 4ZXT). (A–I) represent compounds **2a–2h**, respectively, and (I) corresponds to the standard drug Afatinib.



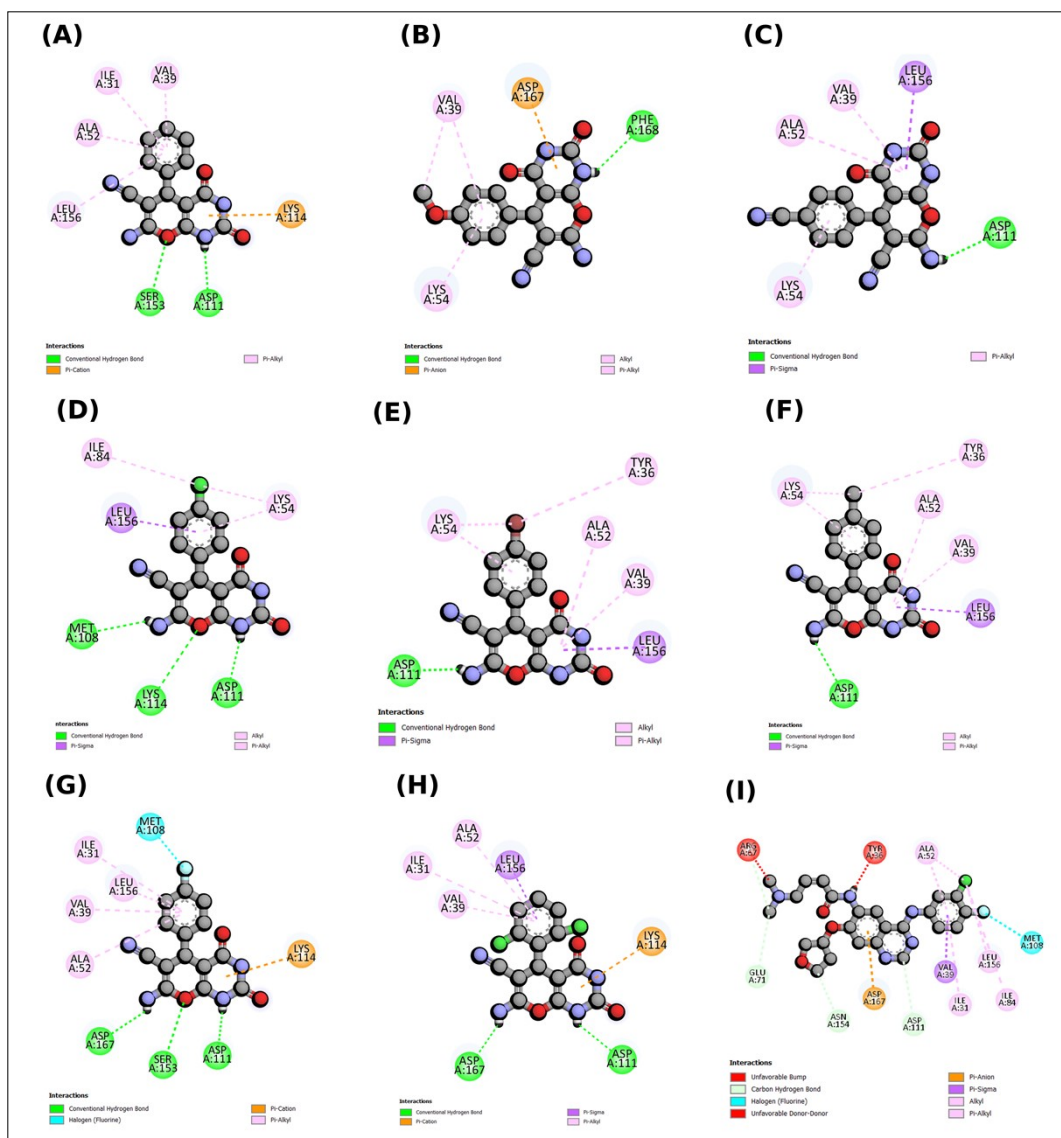

**Fig. S35** Linear regression between AutoDock Vina binding scores (kcal mol<sup>-1</sup>) and cytotoxicity against A549 cells (log<sub>10</sub> IC<sub>50</sub>, μM) for compounds **2a–2h** (**Afatinib** excluded). A simple least-squares fit gives  $R^2 = 0.002$  ( $p = 0.914$ ); Spearman  $\rho = 0.048$  ( $p = 0.910$ ).

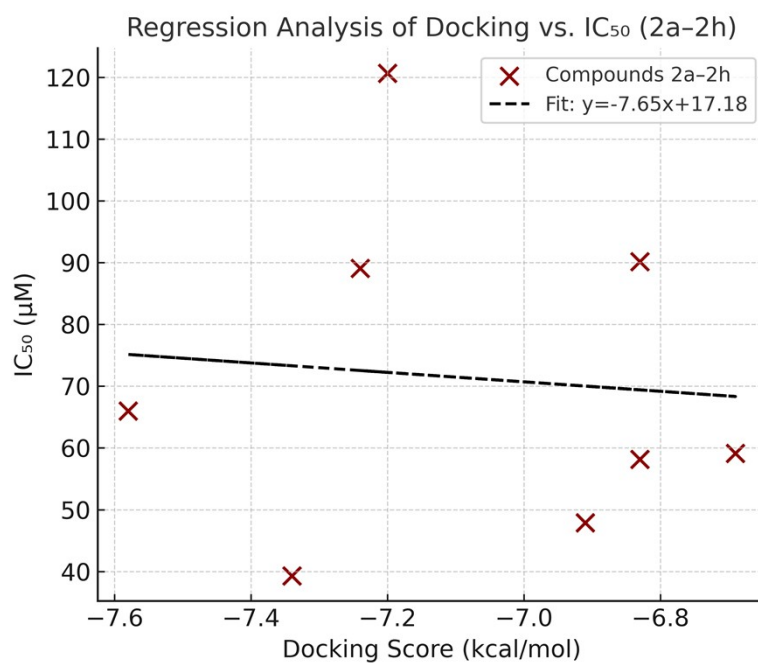

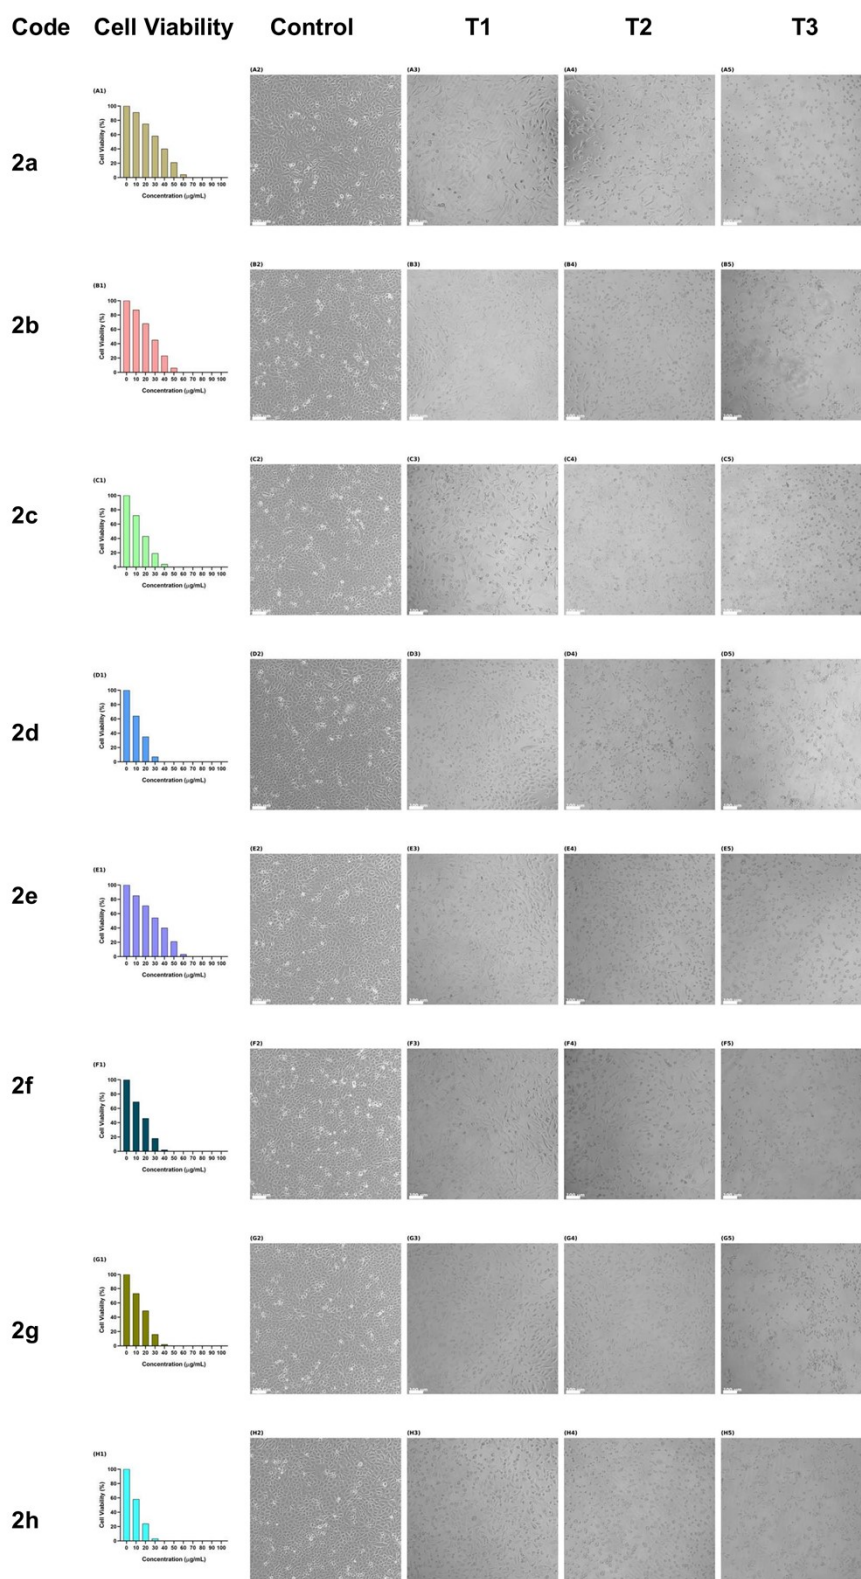

**Fig. S36.** MTT assay evaluation of cytotoxic effects of synthesized compounds (**2a–2h**) on A549 lung carcinoma cells. Each row corresponds to one compound: the first column displays cell viability (%) as a function of concentration ( $\mu\text{M}$ ); the second column shows the control A549 cells; the next three columns (T1, T2 and T3) represent triplicate treated wells for the corresponding compound. Decreased cell density and morphological damage reflect concentration-dependent cytotoxicity.

**Table S1:** Experimental and calculated  $^1\text{H}$  NMR chemical shifts ( $\delta$  in ppm) of compound **2a** at the B3LYP/def2-TZVP level of theory in DMSO phase.

| <b>Atom</b> | <b>B3LYP/def2-TZVP</b> | <b>Exp</b>  |
|-------------|------------------------|-------------|
| H24         | 4.4                    | 4.2         |
| H22         | 5.0                    | 7.1         |
| H23         | 4.5                    | 7.1         |
| H26         | 7.5                    | 7.2         |
| H27         | 7.5                    | 7.2         |
| H29         | 7.5                    | 7.2         |
| H25         | 7.7                    | 7.3         |
| H28         | 7.6                    | 7.3         |
| H30         | 7.0                    | 11.1        |
| H31         | 7.1                    | 12.1        |
|             | <b>RMSD</b>            | <b>2.30</b> |

**Table S2:** Experimental and calculated  $^1\text{H}$  NMR chemical shifts ( $\delta$  in ppm) of compound **2b** at the B3LYP/def2-TZVP level of theory in DMSO phase.

| <b>ATOM</b> | <b>B3LYP/def2<br/>-TZVP</b> | <b>Exp</b> |
|-------------|-----------------------------|------------|
| H33         | 3.7                         | 3.7        |
| H35         | 3.7                         | 3.7        |
| H34         | 4.0                         | 3.7        |
| H24         | 4.3                         | 4.2        |
| H23         | 4.4                         | 7.0        |
| H22         | 4.9                         | 7.0        |
| H28         | 6.9                         | 7.1        |
| H30         | 7.0                         | 12.0       |
| H26         | 7.1                         | 7.1        |
| H31         | 7.1                         | 11.0       |
| H25         | 7.3                         | 7.1        |
| H29         | 7.6                         | 7.1        |
|             | <b>RMSD</b>                 | <b>2.1</b> |

**Table S3:** Experimental and calculated  $^1\text{H}$  NMR chemical shifts ( $\delta$  in ppm) of compound **2c** at the B3LYP/def2-TZVP level of theory in DMSO phase

| <b>Atom</b> | <b>B3LYP/def2-TZVP</b> | <b>Exp</b> |
|-------------|------------------------|------------|
| H26         | 4.5                    | 4.3        |
| H25         | 4.5                    | 7.2        |
| H24         | 5.1                    | 7.2        |
| H27         | 7.6                    | 7.4        |
| H30         | 7.8                    | 7.4        |
| H29         | 7.9                    | 7.7        |
| H28         | 8.0                    | 7.7        |
| H31         | 7.0                    | 11.1       |
| H32         | 7.1                    | 12.1       |
|             | <b>RMSD</b>            | <b>2.4</b> |

**Table S4:** Experimental and calculated  $^1\text{H}$  NMR chemical shifts ( $\delta$  in ppm) of compound **2d** at the B3LYP/def2-TZVP level of theory in DMSO phase.

| <b>ATOM</b> | <b>B3LYP/def2-TZVP</b> | <b>Exp</b> |
|-------------|------------------------|------------|
| H21         | 5.1                    | 7.2        |
| H22         | 4.5                    | 7.2        |
| H23         | 4.4                    | 4.2        |
| H24         | 7.4                    | 7.2        |
| H25         | 7.6                    | 7.3        |
| H27         | 7.5                    | 7.2        |
| H28         | 7.7                    | 7.3        |
| H29         | 7.0                    | 11.1       |
| H30         | 7.1                    | 12.1       |
|             | <b>RMSD</b>            | <b>2.4</b> |

**Table S5:** Experimental and calculated  $^1\text{H}$  NMR chemical shifts ( $\delta$  in ppm) of compound **2e** at the B3LYP/def2-TZVP level of theory in DMSO phase

| <b>Atom</b> | <b>B3LYP/def2-TZVP</b> | <b>Exp</b> |
|-------------|------------------------|------------|
| H24         | 4.4                    | 4.2        |
| H23         | 4.5                    | 7.2        |
| H22         | 5.1                    | 7.2        |
| H29         | 7.4                    | 7.2        |
| H26         | 7.5                    | 7.2        |
| H28         | 7.6                    | 7.5        |
| H25         | 7.6                    | 7.5        |
| H30         | 7.0                    | 11.1       |
| H31         | 7.1                    | 12.1       |
|             | <b>RMSD</b>            | <b>2.4</b> |



**Table S6:** Experimental and calculated  $^1\text{H}$  NMR chemical shifts ( $\delta$  in ppm) of compound **2f** at the B3LYP/def2-TZVP level of theory in DMSO phase

| <b>Atom</b> | <b>B3LYP/def2-TZVP</b> | <b>Exp</b> |
|-------------|------------------------|------------|
| H33         | 2.0                    | 2.3        |
| H32         | 2.4                    | 2.3        |
| H34         | 2.5                    | 2.3        |
| H24         | 4.3                    | 4.2        |
| H23         | 4.5                    | 7.1        |
| H22         | 4.9                    | 7.1        |
| H30         | 7.0                    | 11.1       |
| H31         | 7.1                    | 12         |
| H25         | 7.3                    | 7.1        |
| H28         | 7.4                    | 7.1        |
| H26         | 7.4                    | 7.1        |
| H29         | 7.5                    | 7.1        |
|             | <b>RMSD</b>            | <b>2.1</b> |

**Table S7:** Experimental and calculated  $^1\text{H}$  NMR chemical shifts ( $\delta$  in ppm) of compound **2g** at the B3LYP/def2-TZVP level of theory in DMSO phase

| <b>Atom</b> | <b>B3LYP/def2-TZVP</b> | <b>Exp</b> |
|-------------|------------------------|------------|
| H24         | 4.4                    | 4.2        |
| H23         | 4.5                    | 7.1        |
| H22         | 5.1                    | 7.1        |
| H30         | 7.0                    | 11.1       |
| H31         | 7.1                    | 12.1       |
| H28         | 7.2                    | 7.1        |
| H26         | 7.3                    | 7.2        |
| H25         | 7.5                    | 7.3        |
| H29         | 7.7                    | 7.3        |
|             | <b>RMSD</b>            | <b>2.4</b> |

**Table S8:** Experimental and calculated  $^1\text{H}$  NMR chemical shifts ( $\delta$  in ppm) of compound **2h** at the B3LYP/def2-TZVP level of theory in DMSO phase

| Atom | B3LYP/def2-TZVP | Exp        |
|------|-----------------|------------|
| H22  | 5.0             | 7.43       |
| H23  | 4.5             | 7.42       |
| H24  | 5.8             | 5.25       |
| H26  | 7.6             | 7.2        |
| H27  | 7.5             | 7.3        |
| H28  | 7.5             | 7.2        |
| H30  | 7.0             | 11         |
| H31  | 7.1             | 12.06      |
|      | <b>RMSD</b>     | <b>2.6</b> |

**Table S9:** Experimental and calculated  $^{13}\text{C}$  NMR chemical shifts ( $\delta$  in ppm) of compound **2a** at the B3LYP/def2-TZVP level of theory in DMSO phase

| Atom | B3LYP/def2-TZVP | Exp        |
|------|-----------------|------------|
| C6   | 48.9            | 39.5       |
| C3   | 71.2            | 62.7       |
| C13  | 104.9           | 92.3       |
| C4   | 131.7           | 123.0      |
| C10  | 137.2           | 130.6      |
| C9   | 138.0           | 131.1      |
| C12  | 139.5           | 131.1      |
| C8   | 140.0           | 132.1      |
| C11  | 139.6           | 132.1      |
| C17  | 157.1           | 148.0      |
| C7   | 160.9           | 153.3      |
| C14  | 166.0           | 156.1      |
| C19  | 171.3           | 161.5      |
| C2   | 175.6           | 166.3      |
|      | <b>RMSD</b>     | <b>8.8</b> |

**Table S10:** Experimental and calculated  $^{13}\text{C}$  NMR chemical shifts ( $\delta$  in ppm) of compound **2b** at the B3LYP/def2-TZVP level of theory in DMSO phase

| <b>ATOM</b> | <b>B3LYP/def2-TZVP</b> | <b>Exp</b> |
|-------------|------------------------|------------|
| C6          | 48.1                   | 39.5       |
| C32         | 62.3                   | 59.6       |
| C3          | 71.3                   | 63.8       |
| C13         | 104.9                  | 93.3       |
| C11         | 117.1                  | 118.2      |
| C9          | 128.3                  | 119.4      |
| C4          | 131.8                  | 123.4      |
| C8          | 140.0                  | 132.9      |
| C12         | 140.9                  | 132.9      |
| C7          | 151.0                  | 140.9      |
| C17         | 157.0                  | 154.0      |
| C14         | 165.7                  | 156.6      |
| C19         | 171.3                  | 162.1      |
| C10         | 173.5                  | 162.7      |
| C2          | 175.5                  | 167.0      |
|             | <b>RMSD</b>            | <b>8.2</b> |

**Table S11:** Experimental and calculated  $^{13}\text{C}$  NMR chemical shifts ( $\delta$  in ppm) of compound **2c** at the B3LYP/def2-TZVP level of theory in DMSO phase

| Atom | B3LYP/def2-TZVP | Exp         |
|------|-----------------|-------------|
| C6   | 49.3            | 39.5        |
| C3   | 69.0            | 61.3        |
| C15  | 103.6           | 91.0        |
| C10  | 118.3           | 113.2       |
| C4   | 131.6           | 122.5       |
| C11  | 133.3           | 122.6       |
| C8   | 141.0           | 132.2       |
| C14  | 141.9           | 132.2       |
| C13  | 145.2           | 135.9       |
| C9   | 146.5           | 135.9       |
| C19  | 156.8           | 153.2       |
| C16  | 165.7           | 153.4       |
| C7   | 167.4           | 156.3       |
| C21  | 171.4           | 161.4       |
| C2   | 175.4           | 166.1       |
|      | <b>RMSD</b>     | <b>9.60</b> |

**Table S12:** Experimental and calculated  $^{13}\text{C}$  NMR chemical shifts ( $\delta$  in ppm) of compound **2d** at the B3LYP/def2-TZVP level of theory in DMSO phase

| ATOM | B3LYP/def2-TZVP | Exp         |
|------|-----------------|-------------|
| C5   | 48.3            | 34.6        |
| C2   | 69.3            | 57.8        |
| C12  | 104.3           | 87.5        |
| C3   | 131.8           | 118.5       |
| C10  | 138.6           | 127.6       |
| C8   | 140.4           | 128.8       |
| C7   | 141.3           | 129.2       |
| C11  | 142.3           | 131.6       |
| C9   | 149.6           | 142.6       |
| C16  | 156.9           | 148.9       |
| C6   | 158.9           | 151.8       |
| C13  | 165.1           | 157.0       |
| C18  | 171.2           | 159.6       |
| C1   | 175.7           | 161.9       |
|      | <b>RMSD</b>     | <b>11.5</b> |

**Table S13:** Experimental and calculated  $^{13}\text{C}$  NMR chemical shifts ( $\delta$  in ppm) of compound **2e** at the B3LYP/def2-TZVP level of theory in DMSO phase

| Atom | B3LYP/def2-TZVP | Exp         |
|------|-----------------|-------------|
| C6   | 48.5            | 39.5        |
| C3   | 69.4            | 62.5        |
| C13  | 104.0           | 92.2        |
| C4   | 131.7           | 123.2       |
| C10  | 149.8           | 124.0       |
| C9   | 141.3           | 133.9       |
| C12  | 141.6           | 133.9       |
| C8   | 142.7           | 135.4       |
| C11  | 143.1           | 135.4       |
| C17  | 156.9           | 147.8       |
| C7   | 160.1           | 153.7       |
| C14  | 165.2           | 156.6       |
| C19  | 171.3           | 161.8       |
| C2   | 175.3           | 166.6       |
|      | <b>RMSD</b>     | <b>10.7</b> |



**Table S14** Experimental and calculated  $^{13}\text{C}$  NMR chemical shifts ( $\delta$  in ppm) of compound **2f** at the B3LYP/def2-TZVP level of theory in DMSO phase

| Atom | B3LYP/def2-TZVP | Exp        |
|------|-----------------|------------|
| C27  | 28.2            | 24.8       |
| C6   | 48.4            | 39.5       |
| C3   | 71.5            | 63.3       |
| C13  | 105.0           | 92.8       |
| C4   | 131.8           | 123.4      |
| C11  | 138.5           | 131.4      |
| C8   | 139.2           | 131.4      |
| C12  | 139.6           | 133.1      |
| C9   | 139.8           | 133.1      |
| C10  | 151.5           | 139.9      |
| C17  | 157.1           | 145.4      |
| C7   | 157.2           | 153.7      |
| C14  | 165.9           | 156.4      |
| C19  | 171.3           | 161.8      |
| C2   | 175.5           | 166.7      |
|      | <b>RMSD</b>     | <b>8.6</b> |

**Table S15:** Experimental and calculated  $^{13}\text{C}$  NMR chemical shifts ( $\delta$  in ppm) of compound **2g** at the B3LYP/def2-TZVP level of theory in DMSO phase

| Atom | B3LYP/def2-TZVP | Exp         |
|------|-----------------|-------------|
| C6   | 48.3            | weak        |
| C3   | 69.7            | 58.8        |
| C13  | 104.5           | 88.3        |
| C11  | 124.0           | 114.5       |
| C9   | 126.2           | 115.3       |
| C4   | 131.8           | 119.1       |
| C8   | 141.6           | 128.8       |
| C12  | 142.5           | 129.7       |
| C7   | 156.4           | 140.3       |
| C17  | 156.9           | 149.5       |
| C14  | 165.0           | 152.2       |
| C19  | 171.3           | 157.6       |
| C2   | 175.4           | 160.3       |
| C10  | 178.5           | 162.4       |
|      | <b>RMSD</b>     | <b>12.6</b> |

**Table S16:** Experimental and calculated  $^{13}\text{C}$  NMR chemical shifts ( $\delta$  in ppm) of compound **2h** at the B3LYP/def2-TZVP level of theory in DMSO phase.

| Atom | B3LYP/<br>def2-<br>TZVP | Exp         |
|------|-------------------------|-------------|
| C6   | 45.2                    | 32.1        |
| C3   | 65.6                    | 54.1        |
| C13  | 100.8                   | 86.1        |
| C4   | 130.9                   | 118.5       |
| C9   | 139.7                   | 128.6       |
| C10  | 139.8                   | 129.3       |
| C11  | 141.7                   | 130.3       |
| C7   | 151.4                   | 134.1       |
| C12  | 152.7                   | 135.7       |
| C8   | 153.8                   | 135.9       |
| C17  | 156.9                   | 149.5       |
| C14  | 167.6                   | 153.0       |
| C19  | 170.9                   | 158.7       |
| C2   | 176.4                   | 162.1       |
|      | <b>RMSD</b>             | <b>12.7</b> |

**Table S17** Comparative overview of reported catalytic systems for the synthesis of pyrano[2,3-d]pyrimidinone derivatives under different reaction conditions, along with the present Ag<sub>2</sub>WO<sub>4</sub>-catalyzed protocol.

| Entry | Catalyst                                                                                                      | Condition                         | Time/Yield (%)  | Reference        |
|-------|---------------------------------------------------------------------------------------------------------------|-----------------------------------|-----------------|------------------|
| 1.    | $\gamma$ -Fe <sub>2</sub> O <sub>3</sub> @SiO <sub>2</sub> @[Bis-APTES]Cl <sub>2</sub> -NPs                   | EtOH, 70 °C                       | 30min/95        | (ref. 6)         |
| 2.    | Fe <sub>3</sub> O <sub>4</sub> @HWSS@Ag <sup>o</sup>                                                          | EtOH, 75 °C                       | 20-30/80-95     | (ref. 7)         |
| 3.    | Mn-ZIF-8@ZnTiO <sub>3</sub>                                                                                   | EtOH/H <sub>2</sub> O, 70 °C      | 15-30min/95     | (ref. 8)         |
| 4.    | DABCO                                                                                                         | H <sub>2</sub> O, RT,             | 5 min/94        | (ref. 9)         |
| 5.    | PPI                                                                                                           | H <sub>2</sub> O/reflux           | 20 min/94       | (ref. 10)        |
| 6.    | Cellulose based-Nanocomposite                                                                                 | H <sub>2</sub> O, RT              | 30 min/ 96      | (ref. 11)        |
| 7.    | Fe <sub>3</sub> O <sub>4</sub> @SiO <sub>2</sub> @(CH <sub>2</sub> ) <sub>3</sub> -Urea-SO <sub>3</sub> H/HCl | Solvent free, 60 °C               | immediately/98  | (ref. 12)        |
| 8.    | LDH@TRMS@NDBD@Cu(NO <sub>3</sub> ) <sub>2</sub> ,                                                             | Solvent-free,RT                   | 5 min/97        | (ref. 13)        |
| 9.    | CS-ZnONPs                                                                                                     | H <sub>2</sub> O, MW              | 3 min/ 95       | (ref. 14)        |
| 10.   | 2-aminopyridine                                                                                               | EtOH/Reflux                       | 10 min/92       | (ref. 15)        |
| 11.   | <b>Ag<sub>2</sub>WO<sub>4</sub></b>                                                                           | <b>EtOH/H<sub>2</sub>O, 70 °C</b> | <b>5 min/95</b> | <b>This work</b> |

**Table S 18** Structure-Activity Relationship (SAR) analysis of synthesized pyrano[2,3-d]pyrimidinone derivatives (2a-2h) against the A549 cell line, correlating IC<sub>50</sub> values, physicochemical descriptors, and docking scores with substituent effects

| Entry | Substituent                  | IC <sub>50</sub><br>( $\mu$ M) | TPSA<br>( $\text{\AA}^2$ ) | log<br>P | Docking<br>Score<br>(kcal/mol) | Activity<br>Class    | SAR<br>Observation                                                                                    |
|-------|------------------------------|--------------------------------|----------------------------|----------|--------------------------------|----------------------|-------------------------------------------------------------------------------------------------------|
| 2a    | None<br>(Simple<br>scaffold) | 120.65                         | 124.76                     | 1.13     | -7.20                          | Weakly<br>active     | Parent<br>scaffold<br>shows<br>minimal<br>activity;<br>limited<br>substitution<br>reduces<br>binding. |
| 2b    | -OMe                         | 89.09                          | 133.99                     | 1.40     | -7.24                          | Moderately<br>active | Electron-<br>donating<br>OMe group<br>improves<br>activity<br>modestly via<br>enhanced<br>solubility. |
| 2c    | -CN                          | 59.13                          | 148.55                     | 1.35     | -6.69                          | Moderately<br>active | Strong<br>electron-<br>withdrawing<br>CN enhances<br>polarity but<br>reduces<br>docking<br>affinity.  |
| 2d    | -Cl                          | 47.91                          | 124.76                     | 1.40     | -6.91                          | Active               | Chloro<br>substitution<br>increases<br>hydrophobic<br>contacts,<br>enhancing<br>activity.             |
| 2e    | -Br                          | 90.17                          | 124.76                     | 1.50     | -6.83                          | Weakly<br>active     | Bulky Br<br>substitution<br>decreases                                                                 |

|          |                           |       |        |      |       |                   |                                                                                  |
|----------|---------------------------|-------|--------|------|-------|-------------------|----------------------------------------------------------------------------------|
|          |                           |       |        |      |       |                   | bioactivity likely due to steric hindrance.                                      |
| 2f       | -Me                       | 58.15 | 124.76 | 1.39 | -6.83 | Moderately active | Methyl group contributes to hydrophobic stabilization, improving activity.       |
| 2g       | -F                        | 65.97 | 124.76 | 1.22 | -7.58 | Moderately active | Fluoro substitution provides better docking affinity but moderate cell activity. |
| 2h       | -Cl, -Cl (ortho dichloro) | 39.29 | 124.76 | 1.47 | -7.34 | Most active       | Ortho-dichloro substitution improves hydrophobic packing and binding stability.  |
| Afatinib | Reference drug            | 1.4   | 87.22  | 3.95 | -8.01 | Highly active     | Strong binding and potency validate reference standard.                          |
